# Supplementary material for: Global meta-analysis of water cycling response to plant mixture
Source: Copernicus journal article supplement (doi:10.5194/egusphere-2023-719), 2023-05-30
Supplement: Supplementary file 1 [file egusphere-2023-719-supplement.pdf]

Supporting Information for

**Global meta-analysis of water cycling response to plant mixture**

**Table S1** Reviewed references of the responses of water cycle processes to plant mixtures in this meta-analysis.

| <b>Reference</b>            | <b>SWC</b> | <b>IR</b> | <b>RO</b> | <b>E</b> | <b>LT</b> | <b>Th</b> | <b>WUE</b> |
|-----------------------------|------------|-----------|-----------|----------|-----------|-----------|------------|
| (Altinalmazis et al., 2020) | Yes        |           |           |          |           |           |            |
| (Ma et al., 2020)           | Yes        |           |           |          |           |           |            |
| (Wang et al., 2020)         | Yes        |           |           |          |           |           |            |
| (Nyawade et al., 2019)      | Yes        |           |           |          |           |           | Yes        |
| (Ren et al., 2019)          | Yes        |           |           |          |           |           |            |
| (Li et al., 2019)           |            |           |           |          |           |           |            |
| (Ma et al., 2019)           | Yes        |           |           |          |           |           |            |
| (Khan & Mcvay, 2019)        | Yes        |           |           |          |           |           |            |
| (Tetteh et al., 2019)       | Yes        | Yes       |           |          |           |           |            |
| (Nelson et al., 2018)       | Yes        |           |           |          |           |           |            |
| (Collins et al., 2017)      | Yes        |           |           |          |           |           |            |
| (Ouyang et al., 2017)       |            |           | Yes       |          |           |           |            |
| (Rahman et al., 2017)       | Yes        |           |           | Yes      |           | Yes       | Yes        |
| (Rahman & Ye et al., 2017)  | Yes        |           | Yes       |          | Yes       |           | Yes        |
| (Chimonyo et al., 2016)     |            |           |           |          |           |           | Yes        |
| (Liu et al., 2013)          | Yes        |           |           |          |           |           |            |
| (Mao et al., 2012)          | Yes        |           |           |          |           |           |            |
| (Moore et al., 2011)        | Yes        |           |           |          |           |           |            |
| (Gao et al., 2010)          | Yes        |           |           |          |           |           |            |
| (Xu et al., 2008)           |            |           |           |          |           |           | Yes        |
| (Xu et al., 2008)           | Yes        |           |           |          |           |           | Yes        |
| (Gathumbi et al., 2002)     | Yes        |           |           |          |           |           |            |
| (Wang et al., 2017)         |            |           |           |          | Yes       |           |            |
| (Fan et al., 2016)          | Yes        |           | Yes       | Yes      |           |           |            |
| (Wang et al., 2015)         |            | Yes       |           |          |           |           |            |
| (Sun et al., 2014)          | Yes        |           |           |          |           |           |            |

|                          |     |     |     |
|--------------------------|-----|-----|-----|
| (Nagase & Dunnett, 2012) |     | Yes |     |
| (Zhao et al., 2012)      |     | Yes |     |
| (Fox et al., 2011)       |     | Yes |     |
| (Forrester et al., 2010) | Yes |     | Yes |
| (Jahansooz et al., 2007) | Yes |     | Yes |
| (Ogindo & Walker, 2005)  | Yes |     |     |
| (Powell & Bork, 2004)    | Yes |     |     |
| (Schume et al., 2004)    | Yes |     |     |
| (Chirwa et al., 2003)    |     | Yes |     |
| (Liu et al., 2021)       |     | Yes |     |
| (Zhao et al., 2021)      | Yes |     |     |
| (Chen et al., 2020)      |     | Yes |     |
| (Fei et al., 2020)       |     | Yes |     |
| (Li et al., 2020)        | Yes |     | Yes |
| (An et al., 2019)        |     | Yes |     |
| (Xu et al., 2019)        |     |     | Yes |
| (Zhou et al., 2019)      | Yes |     |     |
| (Chen & Zheng, 2018)     |     |     | Yes |
| (Ouyang et al., 2018)    |     | Yes |     |
| (Du et al., 2017)        |     | Yes |     |
| (Zhang et al., 2017)     | Yes |     |     |
| (Zheng & Chen, 2017)     |     | Yes | Yes |
| (Chen et al., 2016)      |     |     | Yes |
| (Fan & Wu et al., 2016)  | Yes |     |     |
| (Wang & Wang, 2016)      | Yes |     |     |
| (Wang et al., 2016)      |     | Yes |     |
| (Xiong et al., 2016)     |     |     | Yes |
| (Zhao et al., 2016)      | Yes |     |     |

|                           |     |     |     |     |
|---------------------------|-----|-----|-----|-----|
| (Chen et al., 2015)       |     | Yes |     |     |
| (Ding et al., 2015)       |     | Yes |     | Yes |
| (Wang & Chen, 2015)       |     | Yes |     |     |
| (Wu et al., 2015)         |     | Yes |     |     |
| (Ye et al., 2015)         | Yes |     | Yes | Yes |
| (An et al., 2014)         |     | Yes |     |     |
| (Zhao et al., 2012)       | Yes |     |     |     |
| (Chai et al., 2011)       |     |     | Yes |     |
| (Wang et al., 2011)       |     | Yes |     |     |
| (Jie et al., 2008)        | Yes | Yes |     | Yes |
| (Gao et al., 2008)        |     |     | Yes |     |
| (Wang et al., 2008)       |     | Yes |     |     |
| (Jiang et al., 2007)      |     | Yes |     |     |
| (Zhang et al., 2005)      |     | Yes |     |     |
| (Luo et al., 2004)        |     |     |     | Yes |
| (Ning et al., 1999)       |     | Yes |     |     |
| (Machiwal et al., 2021)   |     | Yes |     |     |
| (Mbanyele et al., 2021)   |     |     |     | Yes |
| (Franco et al., 2021)     |     |     |     | Yes |
| (Pankou et al., 2021)     |     |     |     | Yes |
| (Ren et al., 2021)        | Yes |     |     |     |
| (Thomas et al., 2021)     | Yes |     |     |     |
| (Khokhar et al., 2021)    |     | Yes |     |     |
| (Ghahremani et al., 2021) |     | Yes |     |     |
| (Wan et al., 2021)        |     |     |     | Yes |
| (Singh et al., 2020)      |     | Yes |     |     |
| (St Aime et al., 2020)    | Yes |     |     | Yes |
| (Chen et al., 2015)       |     |     |     | Yes |

|                            |     |     |
|----------------------------|-----|-----|
| (Jakhar et al., 2015)      | Yes | Yes |
| (Mu et al., 2013)          |     |     |
| (Niu et al., 2018)         |     |     |
| (Wang et al., 2015)        | Yes | Yes |
| (Gomes et al., 2014)       |     |     |
| (Mohsenabadi et al., 2008) |     | Yes |

Note: SWC: soil water content ( $\text{cm}^3 \text{m}^{-3}$ ); IR: steady infiltration rate ( $\text{mm min}^{-1}$ ); RO: runoff (mm); E: soil evaporation ( $\text{mm day}^{-1}$ ); LT: leaf transpiration ( $\text{mmol m}^{-2} \text{s}^{-1}$ ); Th: throughfall (mm); WUE: water use efficiency ( $\text{g m}^{-2} \text{mm}^{-1}$ )

**Table S2** Values of Akaike information criterion of stand age, and soil depth for each hydrology processes (see Materials and Methods).

| Hydrology<br>process | A             |                  |                | D       |                  |                |
|----------------------|---------------|------------------|----------------|---------|------------------|----------------|
|                      | X             | X+X <sup>2</sup> | Log(X)         | X       | X+X <sup>2</sup> | Log(X)         |
| SWC                  | -1313.3       | -1307.2          | <b>-1314.6</b> | -1314.2 | -1310.6          | <b>-1321.2</b> |
| E                    | <b>-153.7</b> | -150.5           | -151.4         |         |                  |                |
| IR                   | <b>51.5</b>   | 53.8             | 51.6           |         |                  |                |
| RO                   | <b>289.4</b>  | 292.9            | 290.2          |         |                  |                |
| Th                   | -2.0          | -2.0             | <b>-4.6</b>    |         |                  |                |
| LT                   | 5.1           | 5.1              | <b>4.2</b>     |         |                  |                |
| WUE                  | 71.3          | 74.5             | <b>68.2</b>    |         |                  |                |

Note: A and D are stand age or experimental age, and soil depth, respectively. An exponential function was not included since the dependent variable contained negative values. Abbreviations for hydrology process are the same as in Table S1.

**Table S3** Values of Akaike information criterion of stand age, and soil depth for each hydrology processes in crop mixtures(see Materials and Methods).

| Hydrology<br>process | A              |                  |              | D       |                  |                |
|----------------------|----------------|------------------|--------------|---------|------------------|----------------|
|                      | X              | X+X <sup>2</sup> | Log(X)       | X       | X+X <sup>2</sup> | Log(X)         |
| SWC                  | <b>-1241.2</b> | -1235.5          | -1235.6      | -1242.8 | -1236.6          | <b>-1248.2</b> |
| E                    | <b>-186.8</b>  | -181.5           | -186.1       |         |                  |                |
| IR                   |                |                  |              |         |                  |                |
| RO                   | 158.2          | 160.5            | <b>157.7</b> |         |                  |                |
| Th                   |                |                  |              |         |                  |                |
| LT                   | 10.1           | 10.1             | <b>9.4</b>   |         |                  |                |
| WUE                  | 35.4           | 38.3             | <b>34.2</b>  |         |                  |                |

Note: Abbreviation for water cycle processes are the same as in Table S2.

**Table S4** Models forms of different water cycle process.

| Hydrology<br>Process | Full Ecosystem type model |                   | Crop model |              |
|----------------------|---------------------------|-------------------|------------|--------------|
|                      | Random                    | Terms             | AIC        | Terms        |
| SWC                  | ID+SR                     | $\ln(A) + \ln(D)$ | ID+SR      | $A + \ln(D)$ |
| E                    | ID+SR                     | A                 | ID         | A            |
| IR                   | ID                        | A                 |            |              |
| RO                   | ID+SR                     | A                 | ID         | A            |
| Th                   | ID                        | $\ln(A)$          |            |              |
| LT                   | ID+SR                     | $\ln(A)$          | ID         | $\ln(A)$     |
| WUE                  | ID+SR                     | $\ln(A)$          | ID+SR      | $\ln(A)$     |

Note: Abbreviation for water cycle processes are the same as in Table S2.



**Table S5** Proportion of articles and observations on crop mixtures in the database among all ecosystem types.

| Hydrology<br>Process | Observations |      |       | Publications |      |       |
|----------------------|--------------|------|-------|--------------|------|-------|
|                      | Full         | Crop | Ratio | Full         | Crop | Ratio |
| <b>SWC</b>           | 951          | 658  | 69%   | 41           | 22   | 54%   |
| <b>E</b>             | 226          | 151  | 67%   | 9            | 8    | 89%   |
| IR                   | 42           |      |       | 10           |      |       |
| <b>RO</b>            | 208          | 108  | 52%   | 21           | 14   | 67%   |
| Th                   | 30           |      |       | 3            |      |       |
| LT                   | 28           | 10   | 36%   | 7            | 2    | 29%   |
| <b>WUE</b>           | 123          | 102  | 83%   | 22           | 17   | 77%   |

Note: Abbreviation for water cycle processes are the same as in Table S2.

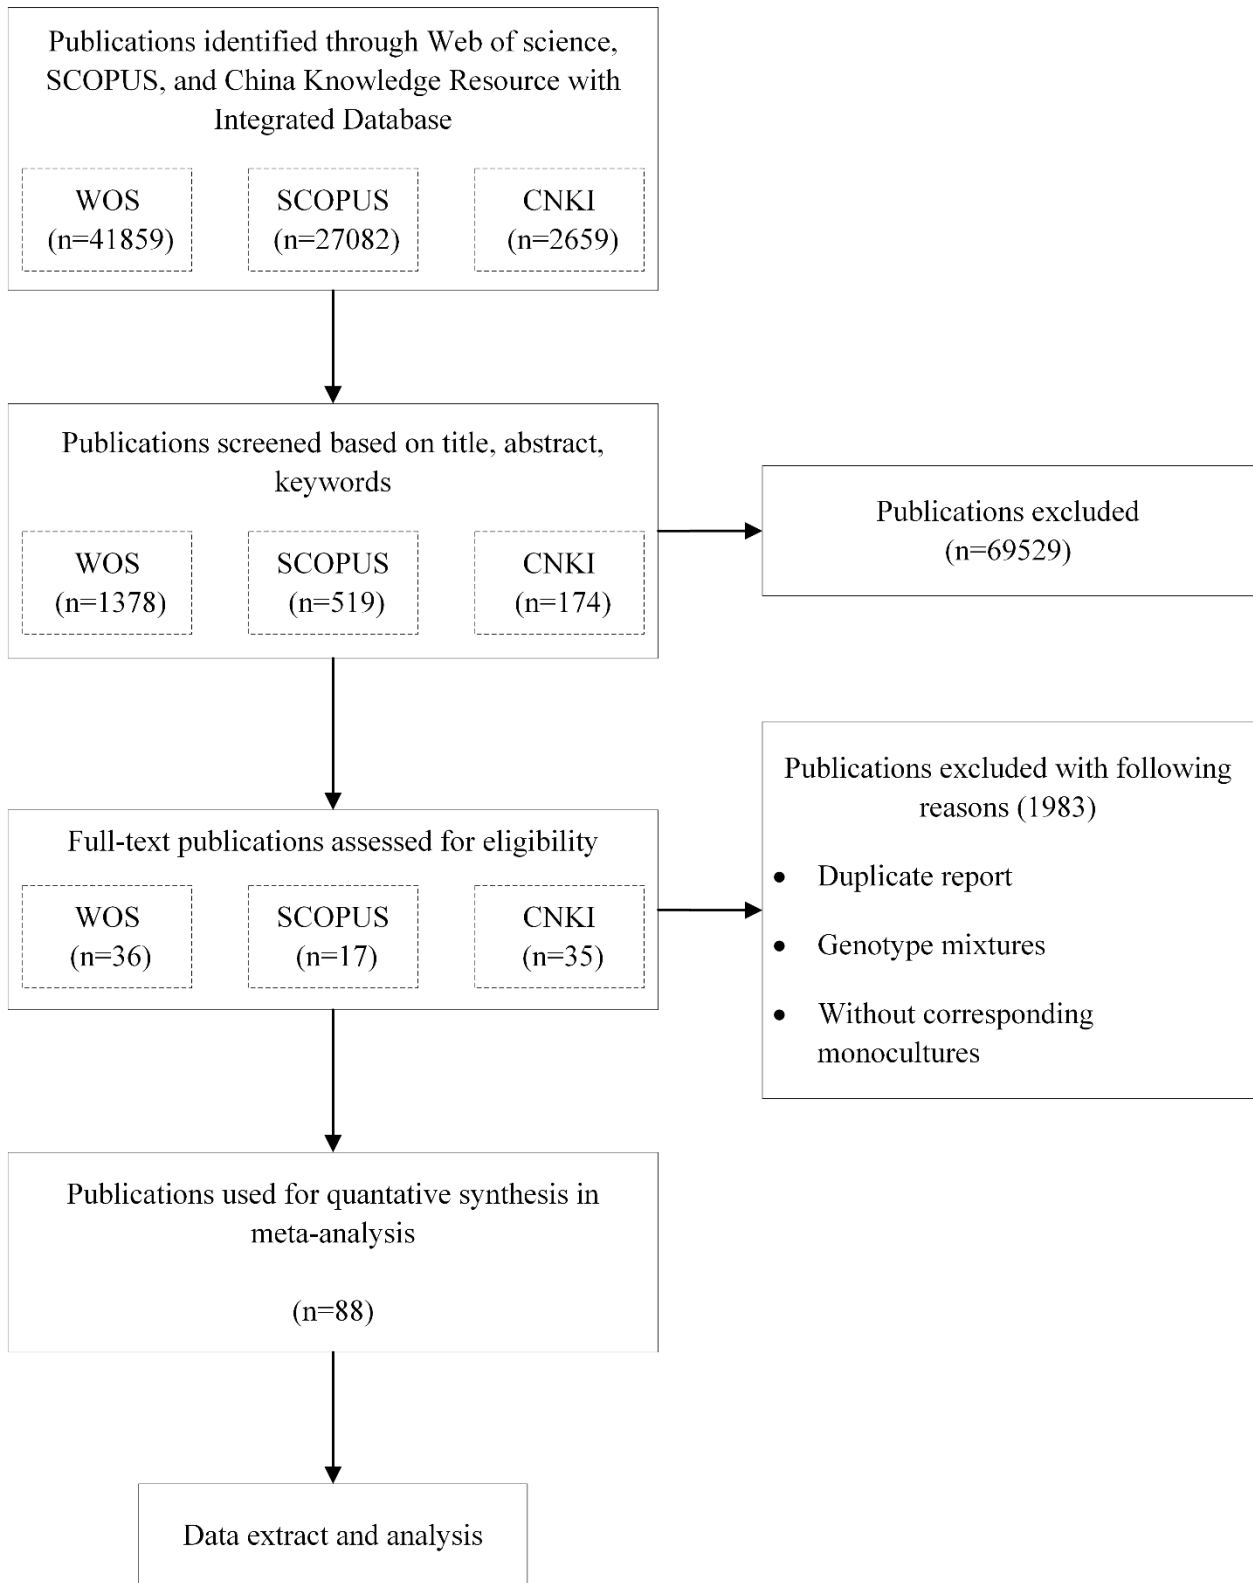

**Figure S1** Flow diagram of document selection

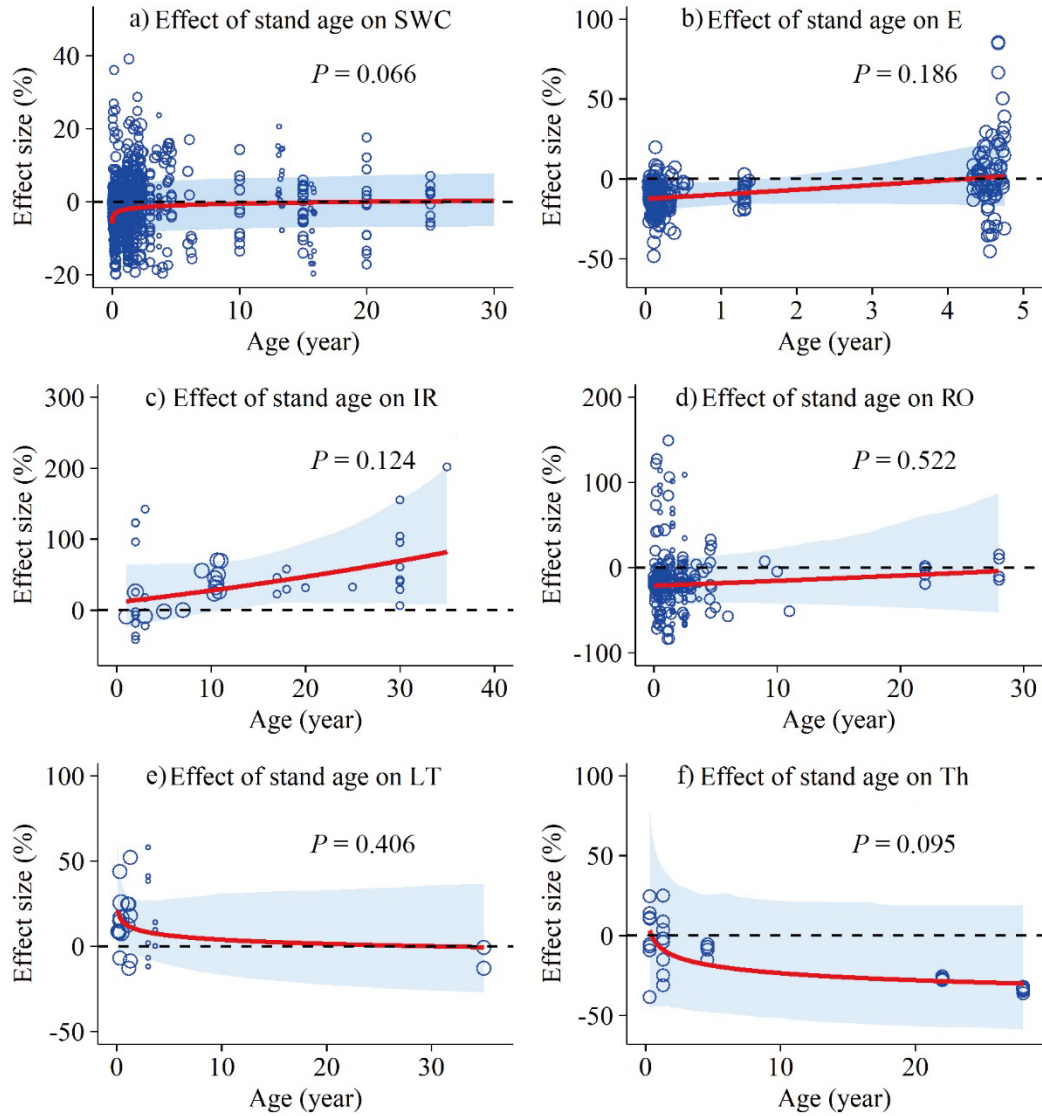

**Figure S2** Plant mixture effect on water cycle processes in terms of stand age. (a) soil water content, (b) soil evaporation, (c) Infiltration rate, (d) Runoff, (e) Leaf transpiration, (f) Throughfall. The red lines are fitted effect sizes, with bootstrapped 95% confidence intervals shaded in blue. The size of circles represents the relative weights of corresponding observations.

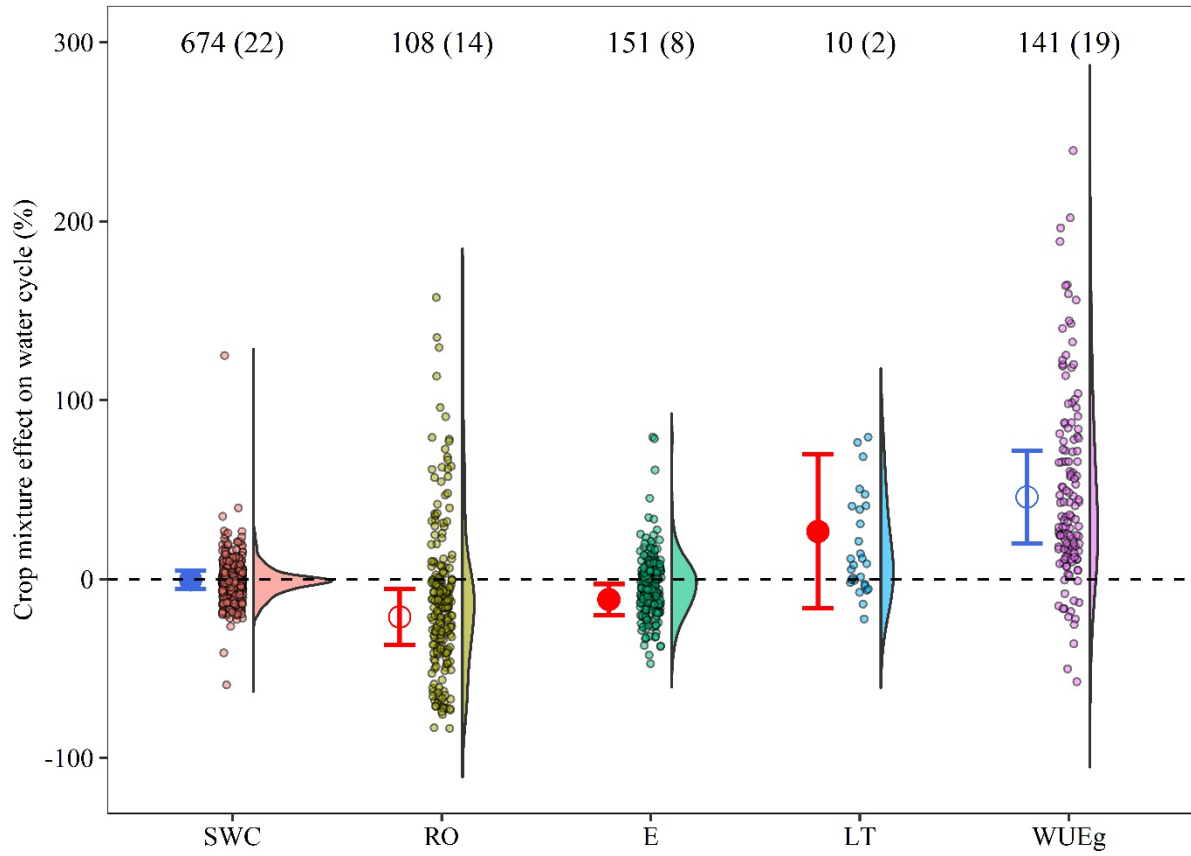

**Figure S3** Comparison of water cycle in crop mixture and monocultures. Each part represents the same meaning as Figure 1.

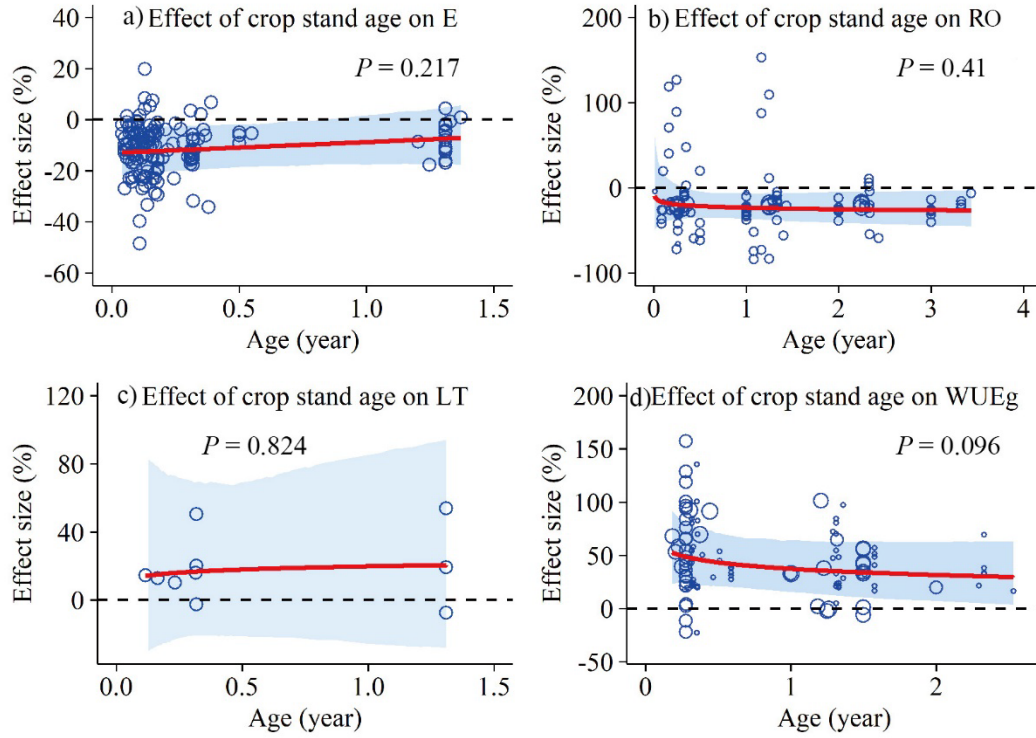

**Figure S4** Crop mixture effect on water cycle in terms of stand age. Each part represents the same meaning as Figure 2.

## References:

- Altinalmazis-Kondylis, A., Muessig, K., Meredieu, C., Jactel, H., Augusto, L., Fanin, N., & Bakker, M. R. (2020). Effect of tree mixtures and water availability on belowground complementarity of fine roots of birch and pine planted on sandy podzol. *Plant and Soil*, 457(1-2SI), 437-455. 10.1007/s11104-020-04741-8
- An, T., He, J., Yang, Y., Han, X., Zhou, F., & Wu, B. (2014). Benefits of soil and water conservation by sweet maize intercropping with different mulches on sloping land. *Bulletin of Soil and Water Conservation*, 34(01), 31-33
- Chai, Q., Yu, A., Chen, G., & Huang, P. (2011). Soil evaporation under sole cropping and intercropping systems and the main driving factors. *Chinese Journal of Eco-Agriculture*, 19(06), 1307-1312
- Changjin, C., Jian, Z., Gang, L., Xia, D., Xuequan, L., & Lianghua, Q. (2020). Interception of N and P by the buffer zone of waterfront vegetation in Danjiangkou Reservoir area of Hubei. *Science Silvae Science*, 56(09), 12-20
- Chen, D., Qu, G., Chen, J., Liu, G., Li, Q., Zhang, S., & Zheng, Y. (2016). Effect of different weather conditions on photosynthetic characteristics of Juvenile plantations of four afforestation tree species in yunnan province. *Journal of southwest forestry university*, 36(05), 32-38
- Chen, G., Chai, Q., Huang, G., Yu, A., Feng, F., Mu, Y., ... Huang, P. (2015). Belowground interspecies interaction enhances productivity and water use efficiency in maize-pea intercropping systems. *Crop Science*, 55(1), 420-428. 10.2135/cropsci2014.06.0439
- Chen, H., & Zheng, L. (2018). Evaporation of wheat/corn intercropping and its main impact factors in oasis irrigation areas. *Gansu Agricultural Science and Technology*, (11), 79-83
- Chen, X., Fan, M., Wang, Z., Ma, Z., & Li, Y. (2015). Effect of different planting patterns on soil and water conservation of sloping cropland in central Yunnan. *Journal of Soil and Water Conservation*, 29(04), 48-52
- Chimonyo, V. G. P., Modi, A. T., & Mabhaudhi, T. (2016). Water use and productivity of a sorghum-cowpea-bottle gourd intercrop system. *Agricultural Water Management*, 165, 82-96. 10.1016/j.agwat.2015.11.014
- Chirwa, T. S., Mafongoya, P. L., & Chintu, R. (2003). Mixed planted-fallows using coppicing and non-coppicing tree species for degraded Acrisols in eastern Zambia. *Agroforestry Systems*, 59(3), 243-251. 10.1023/B:AGFO.0000005225.12629.61
- Collins, H. P., Fay, P. A., Kimura, E., Fransen, S., & Himes, A. (2017). Intercropping with switchgrass improves net greenhouse gas balance in hybrid poplar plantations on a sand soil. *Soil Science of America Journal*, 81(4), 781-795. 10.2136/sssaj2017.09.0294
- Danyang, Z., Xingxing, B., Guirong, H., Yanhong, C., Ning, W., Shanshan, W., ... Chen, F. (2021). Soil moisture dynamics of typical plantation in Loess region of west Shanxi. *Journal of Soil and Water Conservation*, 35(01), 181-187
- Ding, Z., Zu, Y., Chen, J., Bi, B., & Li, Y. (2015). Characteristics of surface runoff, sediment, N and P losses from two agro-forest plantation patterns in Dianchi Basin. *Chinese Journal of Environmental Engineering*, 9(11), 5301-5307
- Du, J., Fan, M., Wang, Z., Ma, Z., Ma, Y., Li, Y., & DE BEURS K M (2017). Effects of root system characteristics and its relationship with soil nutrient loss in runoff under maize and potato intercropping on slop land of red soil. *Journal of Soil and Water Conservation*, 31(01), 55-60

- Li, E., Mu, Yang., He, Y., Zhang, X., & Yang, S. (2020). Effect of wheat/alfalfa intercropping system on soil moisture and water utilization efficiency. *Research of Soil and Water Conservation*, 27(01), 54-58
- Fan, Z., An, T., Wu, K., Zhou, F., Zi, S., Yang, Y., ... Wu, B. (2016). Effects of intercropping of maize and potato on sloping land on the water balance and surface runoff. *Agricultural Water Management*, 166, 9-16. 10.1016/j.agwat.2015.12.006
- Fan, Z., Wu, K., An, T., Yang, Y., Zhou, F., & Wu, B. (2016). Study on transpiration and transpiration efficiency of intercropped maize and potato population. *Agricultural Research in the Arid Areas*, 34(05), 129-137
- Fang, F., Qin, F., Li, L., & Yang, Z. (2020). Study on soil water storage performance of different forest types at the north piedmont of Yinshan Mountains. *Journal of Agricultural Science and Technology*, 22(02), 140-148
- Forrester, D. I., Theiveyanathan, S., Collopy, J. J., & Marcar, N. E. (2010). Enhanced water use efficiency in a mixed Eucalyptus globulus and Acacia mearnsii plantation. *Forest Ecology and Management*, 259(9), 1761-1770. 10.1016/j.foreco.2009.07.036
- Fox, J. L., Bhattarai, S. P., & Gyasi-Agyei, Y. (2011). Evaluation of different seed mixtures for grass establishment to mitigate soil erosion on steep slopes of railway batters. *Journal of Irrigation and Drainage Engineering*, 137(9), 624-631. 10.1061/(ASCE)IR.1943-4774.0000319
- Franco, J. G., Gramig, G. G., Beamer, K. P., & Hendrickson, J. R. (2021). Cover crop mixtures enhance stability but not productivity in a semi-arid climate. *Agronomy of Journal*, 113(3), 2664-2680. 10.1002/agj2.20695
- Gao, Y., Duan, A., Liu, Z., Chen, J., Wang, H., & Liu, Z. (2008). Experimental study on soil evaporation of different intercropping patterns for maize and soybean. *Transactions of the CSAE*, (07), 44-48
- Gao, Y., Duan, A., Qiu, X., Liu, Z., Sun, J., Zhang, J., & Wang, H. (2010). Distribution of roots and root length density in a maize/soybean strip intercropping system. *Agricultural Water Management*, 98(1), 199-212. 10.1016/j.agwat.2010.08.021
- Gathumbi, S. M., Ndufa, J. K., Giller, K. E., & Cadisch, G. (2002). Do species mixtures increase above- and belowground resource capture in woody and herbaceous tropical legumes? *Agronomy Journal*, 94(3), 518-526
- Ghahremani, S., Ebadi, A., Tobeh, A., Hashemi, M., Sedghi, M., Gholipouri, A., & Barker, A. V. (2021). Short-Term Impact of Monocultured and Mixed Cover Crops on Soil Properties, Weed Suppression, and Lettuce Yield. *Communications in soil Science and Plant Analysis*, 52(4), 406-415. 10.1080/00103624.2020.1854295
- Gomes, D. P., de Carvalho, D. F., de Almeida, W. S., Medici, L. O., & Guerra, J. G. M. (2014). Organic carrot-lettuce intercropping using mulch and different irrigation levels. *Journal of Food, Agriculture and Environment*, 12(1), 323-328
- Guangcan, Z., Jiangbao, X., GuiXia, W., Shuyong, Z., & Jihua, Y. (2005). Study on soil moisture physical characteristics of artificial forest in Granite Mountainous region. *Journal of Soil and Water Conservation*, (06), 46-50
- Jahansooz, M. R., Yunusa, I. A. M., Coventry, D. R., Palmer, A. R., & Eamus, D. (2007). Radiation- and water-use associated with growth and yields of wheat and chickpea in sole and mixed crops. *European Journal of Agronomy*, 26(3), 275-282. 10.1016/j.eja.2006.10.008

- Jakhar, P., Adhikary, P., Naik, B., & Madhu, M. (2015). Finger millet (*Eleusine coracana*)-groundnut (*Arachis hypogaea*) strip cropping for enhanced productivity and resource conservation in uplands of Eastern Ghats of Odisha. *Indian Journal of Agronomy*, 60(3), 365-371
- Jiang, P., Guo, F., Luo, Y., Wei, J., Sun, X., & Wu, G. (2007). Water and soil conservation function of typical plantation forest ecosystem in semi-arid region of Western Liaoning Province. *Chinese Journal of Applied Ecology*, (12), 2905-2909
- Chen, J., Liu, W., Zhang, X., Zhang, B., Wang, B., & Yang, Y. (2008). Soil and water conservation benefits and suitability of different forestation on trees in tableland and gully area of the Loess Plateau. *Journal of Northwest A&F University (Nat. Sci. Ed.)*, (06), 97-104
- Khan, Q. A., & McVay, K. A. (2019). Productivity and Stability of Multi-species cover crop mixtures in the northern great plains. *Agronomy Journal*, 111(4), 1817-1827. 10.2134/agronj2018.03.0173
- Khokhar, A., Yousuf, A., Singh, M., Sharma, V., Sandhu, P. S., & Chary, G. R. (2021). Impact of land configuration and strip-Intercropping on runoff, soil loss and crop yields under rainfed conditions in the shivalik foothills of north-west, India. *Sustainability*, 13(11). 10.3390/su13116282
- Li, Q., Zhou, D., Denton, M. D., & Cong, S. (2019). Alfalfa monocultures promote soil organic carbon accumulation to a greater extent than perennial grass monocultures or grass-alfalfa mixtures. *Ecological Engineering*, 131, 53-62. 10.1016/j.ecoleng.2019.03.002
- Liu, S., Chai, Q., & Huang, G. (2013). Relationships among soil respiration, soil temperature and dry matter accumulation for wheat-maize intercropping in an arid environment. *Canadian Journal of Plant*, 93(4), 715-724. 10.4141/CJPS2012-274
- Luo, Y., Han, S., Wang, H., Liu, J., Wei, J., & Wu, G. (2004). Water conservation of several artificial forest ecosystem in semiarid region of western Liaoning Province. *Chinese Journal of Applied Ecology*, (06), 919-923
- Ma, L., Li, Y., Wu, P., Zhao, X., Chen, X., & Gao, X. (2019). Effects of varied water regimes on root development and its relations with soil water under wheat/maize intercropping system. *Plant and Soil*, 439(1-2SI), 113-130. 10.1007/s11104-018-3800-9
- Ma, L., Li, Y., Wu, P., Zhao, X., Chen, X., & Gao, X. (2020). Coupling evapotranspiration partitioning with water migration to identify the water consumption characteristics of wheat and maize in an intercropping system. *Agricultural and Forest Meteorology*, 290(108034). 10.1016/j.agrformet.2020.108034
- Machiwal, D., Kumar, S., Islam, A., Kumar, S., Jat, S. R., Vaishnav, M., & Dayal, D. (2021). Evaluating effect of cover crops on runoff, soil loss and soil nutrients in an Indian arid region. *Communications in Soil Science and Plant Analysis*, 52(14), 1669-1688. 10.1080/00103624.2021.1892726
- Mao, L., Zhang, L., Li, W., van der Werf, W., Sun, J., Spiertz, H., & Li, L. (2012). Yield advantage and water saving in maize/pea intercrop. *Field Crops Research*, 138, 11-20. 10.1016/j.fcr.2012.09.019
- Mbanyele, V., Mtambanengwe, F., Nezomba, H., Groot, J., & Mapfumo, P. (2021). Comparative short-term performance of soil water management options for increased productivity of maize-cowpea intercropping in semi-arid Zimbabwe. *Journal of Agriculture and Food Research*, 5. 10.1016/j.jafr.2021.100189



- Mengjun, W., Guangcan, Z., Xia, L., & Xiaoyou, Y. (2008). Characteristics of soil water infiltration and water - holding under different forest community in Yimeng Mountainous forest area. *Science of Soil and Water Conservation*, 6(06), 26-31
- Mohsenabadi, G. R., Jahansooz, M. R., Chaichi, M. R., Rahimian Mashhadi, H., Liaghat, A. M., & Savaghebi, G. R. (2008). Evaluation of barley-vetch intercrop at different nitrogen rates. *Journal of Agricultural Science and Technology*, 10(1), 23-31
- Moore, G. W., Bond, B. J., & Jones, J. A. (2011). A comparison of annual transpiration and productivity in monoculture and mixed-species Douglas-fir and red alder stands. *Forest Ecology and Management*, 262(12), 2263-2270. 10.1016/j.foreco.2011.08.018
- Mu, Y., Chai, Q., Yu, A., Yang, C., Qi, W., Feng, F., & Kong, X. (2013). Performance of wheat/maize intercropping is a function of belowground interspecies interactions. *Crop Science*, 53(5), 2186-2194. 10.2135/cropsci2012.11.0619
- Nagase, A., & Dunnett, N. (2012). Amount of water runoff from different vegetation types on extensive green roofs: Effects of plant species, diversity and plant structure. *Landscape and Urban Planning*, 104(3-4), 356-363. 10.1016/j.landurbplan.2011.11.001
- Nelson, W. C. D., Hoffmann, M. P., Vadez, V., Roetter, R. P., & Whitbread, A. M. (2018). Testing pearl millet and cowpea intercropping systems under high temperatures. *Field Crops Research*, 217, 150-166. 10.1016/j.fcr.2017.12.014
- Ning, L., Guiying, S., & Guihua, L. (1999). Preliminary study on soil water storage of different plantations. *Journal of Anhui Agricultural Sciences*, (04), 353-355
- Niu, Y. N., Liu, D. M., Luo, Z. Z., & Chai, Q. (2018). Characteristics of crop water consumption under maize/pea intercropping systems with different irrigation levels. *Agricultural Research in the Arid Areas*, 36(1), 83-88. 10.7606/j.issn.1000-7601.2018.01.13
- Nyawade, S. O., Karanja, N. N., Gachene, C. K. K., Gitari, H. I., Schulte-Geldermann, E., & Parker, M. L. (2019). Intercropping optimizes soil temperature and increases crop water productivity and radiation use efficiency of rainfed potato. *American Journal of Potato Research*, 96(5), 457-471. 10.1007/s12230-019-09737-4
- Ogindo, H. O., & Walker, S. (2005). Comparison of measured changes in seasonal soil water content by rainfed maize-bean intercrop and component cropping systems in a semi-arid region of southern Africa. *Physics and Chemistry of the Earth*, 30(11-16 SPEC. ISS.), 799-808. 10.1016/j.pce.2005.08.023
- Ouyang, C., Wu, B., Wu, K., Yang, Y., Duan, Y., Zhang, X., ... De Beurs K M. (2018). Effect of ridging on soil erosion under maize and potato intercropping in southwest China. *Southwest China Journal of Agricultural Science*, 31(09), 1802-1810
- Ouyang, C., Wu, K., An, T., He, J., Zi, S., Yang, Y., & Wu, B. (2017). Productivity, economic, and environmental benefits in intercropping of maize with chili and grass. *Agronomy Journal*, 109(5), 2407-2414. 10.2134/agronj2016.10.0579
- Pankou, C., Lithourgidis, A., & Dordas, C. (2021). Effect of irrigation on intercropping systems of wheat (*Triticum aestivum* L.) with pea (*Pisum sativum* L.). *Agronomy-Basel*, 11(2). 10.3390/agronomy11020283

- Powell, G. W., & Bork, E. W. (2004). Competition and facilitation in mixtures of aspen seedlings, alfalfa, and marsh reedgrass. *Canadian Journal of Forest Research*, 34(9), 1858-1869. 10.1139/X04-065
- Rahman, T., Liu, X., Hussain, S., Ahmed, S., Chen, G., Yang, F., ... Yang, W. (2017). Water use efficiency and evapotranspiration in maize-soybean relay strip intercrop systems as affected by planting geometries. *Plos One*, 12(e01783326). 10.1371/journal.pone.0178332
- Rahman, T., Ye, L., Liu, X., Iqbal, N., Du, J., Gao, R., ... Yang, W. (2017). Water use efficiency and water distribution planting patterns in maize-soybean relay strip intercropping systems. *Experimental Agriculture*, 53(2), 159-177. 10.1017/S0014479716000260
- Ren, J., Zhang, L., Duan, Y., Zhang, J., Evers, J. B., Zhang, Y., ... van der Werf, W. (2019). Intercropping potato (*Solanum tuberosum* L.) with hairy vetch (*Vicia villosa*) increases water use efficiency in dry conditions. *Field Crop Research*, 240, 168-176. 10.1016/j.fcr.2018.12.002
- Ren, Y. Y., Zhang, L., Yan, M. F., Zhang, Y. J., Chen, Y. L., Palta, J. A., & Zhang, S. Q. (2021). Effect of sowing proportion on above- and below-ground competition in maize-soybean intercrops. *Scientific Reports*, 11(1). 10.1038/s41598-021-95242-w
- Schume, H., Jost, G., & Hager, H. (2004). Soil water depletion and recharge patterns in mixed and pure forest stands of European beech and Norway spruce. *Journal of Hydrology*, 289(1-4), 258-274. 10.1016/j.jhydrol.2003.11.036
- Singh, R. K., Chaudhary, R. S., Somasundaram, J., Sinha, N. K., Mohanty, M., Hati, K. M., ... Lal, R. (2020). Soil and nutrients losses under different crop covers in vertisols of Central India. *Journal of Soils and Sediments*, 20(2), 609-620. 10.1007/s11368-019-02437-w
- St Aime, R., Zehnder, G. W., Talley, C., & Narayanan, S. (2020). Differences in biomass production and water use efficiency among seven different cover crops in the wet winter seasons of 2016/17 and 2018 in South Carolina. *Agronomy-Basel*, 10(4). 10.3390/agronomy10040463
- Sun, B., Peng, Y., Yang, H., Li, Z., Gao, Y., Wang, C., ... Liu, Y. (2014). Alfalfa (*Medicago sativa* L.)/maize (*Zea mays* L.) intercropping provides a feasible way to improve yield and economic incomes in farming and pastoral areas of northeast China. *Plos One*, 9(10). 10.1371/journal.pone.0110556
- Tetteh, E. N., Abunyewa, A. A., Tuffour, H. O., Berchie, J. N., Acheampong, P. P., Twum-Ampofo, K., ... Partey, S. T. (2019). Rubber and plantain intercropping: Effects of different planting densities on soil characteristics. *Plos One*, 14(e02092601). 10.1371/journal.pone.0209260
- Thomas, A., Priault, P., Piutti, S., Dalle, E., & Marron, N. (2021). Growth dynamics of fast-growing tree species in mixed forestry and agroforestry plantations. *Forest Ecology and Management*, 480. 10.1016/j.foreco.2020.118672
- Tongxin, A., Feng, Z., Zhenzhen, W., Chengshan, H., Kang, L., Youqiong, Y., & Bozhi, W. (2019). Effect of crop intercropping on soil and water conservation in arable sloping land. *Research of Soil and Water Conservation*, 26(02), 17-22
- Wan, T. Y., Dong, X. W., Yu, L. H., Huang, H. L., Li, D. D., Han, H. Z., ... Tu, S. X. (2021). Comparative study of three *Pteris vittata*-crop intercropping modes in arsenic accumulation and phytoremediation efficiency. *Environmental Technology & Innovation*, 24. 10.1016/j.eti.2021.101923

- Wang, H. Q., Tian, Y. H., Huang, W. L., & Xiao, S. L. (2015). Analyzing the impact of irrigation quantity on biomass and water use efficiency of main grasses in artificial grassland in Inner Mongolia. *Shengtai Xuebao/ Acta Ecologica Sinica*, 35(10), 3225-3232. 10.5846/stxb201312022858
- Wang, J., Yin, W., & Liu, D. (2011). Influence of intercropping maize with alfalfa on runoff and sediment yield after rainfall on loess slope land. *Water Saving Irrigation*, (08), 43-46
- Wang, L., Dai, Y., Sun, J., & Wan, X. (2017). Differential hydric deficit responses of Robinia pseudoacacia and Platycladus orientalis in pure and mixed stands in northern China and the species interactions under drought. *Trees - Structure and Function*, 31(6), 2011-2021. 10.1007/s00468-017-1605-8
- Wang, L., Zhong, C., Gao, P., Xi, W., & Zhang, S. (2015). Soil infiltration characteristics in agroforestry systems and their relationships with the temporal distribution of rainfall on the loess plateau in China. *Plos One*, 10(4). 10.1371/journal.pone.0124767
- Wang, S., & Wang, Y. (2016). Study on mixed sowing of leymus chinensis and alfalfa in semi-arid hilly region of southern Ningxia. *Ningxia Journal of Agricultural and Forest Science and Technology*, 57(02), 7-9
- Wang, X., Wang, H., Li, W., & Bi, S. (2016). Research on soil water and crop yield of alfalfa-maize intercropping system at slope land in the hilly regions of Sichuan province. *Journal of Natural Science of Hunan Normal University*, 39(06), 9-14
- Wang, Y., & Chen, J. (2015). Study on yield and soil and water conservation benefit of maize and potato intercropping in slope farmland. *Yunnan Agriculture*, (03), 40-43
- Wang, Z., Jiang, H., & Shen, Y. (2020). Forage production and soil water balance in oat and common vetch sole crops and intercrops cultivated in the summer-autumn fallow season on the Chinese Loess Plateau. *European Journal of Agronomy*, 115(126042). 10.1016/j.eja.2020.126042
- Wu, X., Wei, Y., Wang, M., & Wang, L. (2015). Characteristics of runoff and sediment yield in sloping farmland of black soil region under different farmland vegetation. *Bulletin of Soil and Water Conservation*, 35(03), 101-104
- Xaioe, L., Shipipng, S., & Yi, L. (2021). Soil infiltration characteristics under five forest types in southern and northern mountains of Lanzhou city. *Bulletin of Soil and Water Conservation*, 41(03), 69-75
- Xiong, J., Yan, H., Shao, W., Tan, W., Tang, X., Li, W., ... Zheng, X. (2016). Effects of cassava + peanut intercropping on photosynthetic characteristics, agronomic characters and yield of crops. *Jiangsu Agricultural Sciences*, 44(06), 165-168
- Xu, B. C., Li, F. M., & Shan, L. (2008). Switchgrass and milkvetch intercropping under 2 : 1 row-replacement in semiarid region, northwest China: Aboveground biomass and water use efficiency. *European Journal of Agronomy*, 28(3), 485-492. 10.1016/j.eja.2007.11.011
- Xu, B., Shan, L., Zhang, S., Deng, X., & Li, F. (2008). Evaluation of switchgrass and sainfoin intercropping under 2:1 row-replacement in semiarid region, northwest China. *Agrican Journal of Biotechnology*, 7(22), 4056-4067
- Xu, P., Chen, G., Wu, Q., Zhai, Y., Feng, F., Li, L., ... Wang, P. (2019). Effects of field collocation patterns on water consumption characteristics of jujube-cotton intercropping system in Southern Xinjiang. *Agricultural Research in the Arid Areas*, 37(05), 46-54

- Ye, L., Yang, F., Su, B., Zhang, J., Liu, W., & Yang, W. (2015). Effect of different field patterns on water distribution and water use efficiency in maize-soybean relay intercropping systems. *Agricultural research in the arid areas*, 33(04), 41-48
- Zhang, Z., Shi, H., Li, X., & Yan, J. (2017). Research on the mechanism of water and salt transport in root soil and the advantage of intercropping system in Hetao irrigation district. *Journal of Hydraulic Engineering*, 48(04), 408-416
- Zhao, R., Zhang, J., Li, Y., Zhang, Y., & Tian, N. (2016). Soil moisture characteristics and its response to rainfall in artificial forests in Loess region of western Shanxi province. *Journal of Soil and Water Conservation*, 30(01), 178-183
- Zhao, X., Sun, D., & Wang, Q. (2012). Effect of intercropped models of maize and cabbage on the temporal and spatial distribution of soil moisture and water use efficiency. *Chinese Journal of Agrometeorology*, 33(03), 374-381
- Zhao, Y., Zhang, B., & Hill, R. (2012). Water use assessment in alley cropping systems within subtropical China. *Agroforestry Systems*, 84(2), 243-259. 10.1007/s10457-011-9458-4
- Zheng, L., & Chen, H. (2017). Yield and soil moisture consumption of intercropping maize with wheat. *Gansu Agricultural Science and Technology*, (12), 53-57
- Zhou, Q., Chen, J., Shi, C., Xing, Y., Ma, S., Zhang, X., ... De Beurs K M. (2019). Effects of Chinese milk vetch intercropping with rapeseed under straw mulching on soil microenvironment. *Agricultural Research in the Arid Areas*, 37(04), 193-199
