# Supplementary material for: Global meta-analysis of water cycling response to plant mixture
Source: Copernicus journal article supplement (doi:10.5194/egusphere-2023-719), 2023-05-30
Supplement: Supplementary file [file egusphere-2023-719-AC3-supplement.pdf]

This meta-analysis examines the effects of plant mixtures on various processes of the water cycle and how these effects differ among ecosystem types, climate conditions, soil properties, and management practices. The authors report that plant mixtures have both positive and negative impacts, depending on the water cycle process considered and that the effect size of plant mixtures strongly depend on ecosystem types considered as well as soil and climatic factors.

### **Specific comments:**

While the topic of the study is highly interesting, I have some major concerns:

The distribution of the vegetation types and also of the water cycle processes considered is highly unbalanced. The purpose of a global meta-analysis becomes questionable when there are fewer than 10 grassland studies included and for some processes, fewer than 10 publications are available (as noted in my specific comment). The limited number of publications makes it challenging to derive meaningful results, especially when comparing processes across different ecosystem types. I recommend either expanding the number of studies in the meta-analysis or focusing on ecosystems with a substantial number of studies (such as forests, agroforestry, and croplands). If the latter option is chosen, please update the title accordingly.

**Response:** Thanks a lot for your comments and suggestion. Here, we choose to expand the number of studies in the meta-analysis. First, we modify the inclusion criteria. In the original version, we excluded studies that did not provide explicit planting durations. At this time, we find that a lack of planting duration does not significantly skew our overall analysis. Therefore, we now include articles without explicit planting durations in the updated database. Second, we extend the ending time from January 1 2022 to October 1 2023 in literature survey. In this way, the whole dataset for meta-analysis is boosted. Finally, we reviewed the whole literature and added more data that were previously left out. Now, a total of 161 studies with 2,973 paired observations from 130 publications were included in the database (113 studies, 1631 paired observations and 88 publications in original database). Despite the updated database remains imbalance, the number of studies for each vegetation types is greatly increased. Moreover, we will report the number of literature and observations in the revised manuscript.

It is not clear what is a monoculture in agroforestry. “Agroforestry refers to any of a broad range of land use practices where pasture or crops are integrated with trees and shrubs [<https://en.wikipedia.org/wiki/Agroforestry>]. In forests it is likely the dominating tree species in a plantation. However, this needs to be defined/explained. Thus, further explanations and definitions are needed, and probably the authors need to re-evaluate the studies.

**Response:** Thanks for your comments. We have re-evaluated the article included based on this criterion. The studies in the articles by Sun et al. (2014), Li et al. (2020), and Wang et al. (2011) are about the mixture of herbaceous plants and crops. We will classify them as crops in the revised paper.

### **Reference**

Sun, B., Peng, Y., Yang, H., Li, Z., Gao, Y., Wang, C., Yan, Y., & Liu, Y. (2014). Alfalfa (*Medicago sativa* L.)/Maize (*Zea mays* L.) Intercropping Provides a Feasible Way to Improve Yield and Economic

Incomes in Farming and Pastoral Areas of Northeast China. *PLoS ONE*, 9(10), e110556. <https://doi.org/10.1371/journal.pone.0110556>

Li E., Mu Y., He Y., Zhang X., & Yang S. (2020). Effects of wheat/alfalfa intercropping systems on soil moisture and water utilization efficiency. *Research of Soil and Water Conservation*, 27(1), 54-58+65. <https://doi.org/10.13869/j.cnki.rswc.2020.01.008>

Wang, L., Zhong, C., Gao, P., Xi, W., & Zhang, S. (2015). Soil infiltration characteristics in agroforestry systems and their relationships with the temporal distribution of rainfall on the loess plateau in China. *PLoS ONE*, 10(4), e0124767. <https://doi.org/10.1371/journal.pone.0124767>

In addition, the text needs linguistic revision. In particular, the use of scientific terms and the presentation of graphics are sometimes a bit sloppy. I have listed some, but not all, typos and incorrectly used terms below.

**Response:** Thanks for your comments. We have carefully checked the language of the manuscript with the help of a native English-speaking editor. The English will be clearly improved in the revised manuscript.

Ls13-14: Please rephrase. Since meta analyses are based on many publications, some understanding how plant mixtures impact the water cycle is already there. But, are there contrasting findings, or could findings be generalized, even over different vegetation types?

**Response:** We agree. We will change it to "However, the effects of plant mixing on the water cycle is equivocal" in the revised manuscript.

L17: In terms of functions such as transpiration "increasing" is likely more appropriated that "improved"

**Response:** We agree. We will edit the text in the revised manuscript.

L22: Do you mean "mixtures" instead of "minutes"?

**Response:** Yes. We will edit the text in the revised manuscript.

L23: "impact" or similar is more appropriated than "regulate"

**Response:** We agree. We will edit the text in the revised manuscript.

L24: What is a "positive water cycle"? please rephrase.

**Response:** Here we meant that plant mixtures could reduce soil evaporation and increase transpiration and water use efficiency. We will change it to "This work highlights the importance of plant mixture in facilitating infiltration and plant water use and provide insights into the establishment of sustainable ecosystems" in the revised manuscript.

L35: What is meant by "Plant mixtures [...] not only promote species recruitment"? Maybe remove as not related to the study.

**Response:** We agree. We will edit the text in the revised manuscript.

L38: Remove dot before the references.

**Response:** We agree. We will edit the text in the revised manuscript.

Ls42-45: Unclear, what is meant by negative effects, if the result of higher diversity is improved soil water availability. Please elaborate on this.

**Response:** Thanks for your comment. The term “negative effect” is ambiguous and not suitable here. So, we will delete the sentence “Although extensive research has demonstrated the potential of plant diversity to benefit the water cycle, potential negative effects have also been highlighted” in the revised manuscript. And the following text will be edited as follows.

“For example, some studies demonstrated that overyielding of mixture relative to monoculture reduced throughfall but increased stemflow, infiltration and soil water availability (Göransson et al., 2016; Leimer et al., 2018)”

#### **Reference**

Göransson, H., Bambrick, M. T., & Godbold, D. L. (2016). Overyielding of temperate deciduous tree mixtures is maintained under throughfall reduction. *Plant and Soil*, 408(1-2), 285-298. doi:10.1007/s11104-016-2930-1

Leimer, S., Bischoff, S., Boch, S., Busch, V., Escher, P., Fischer, M., ... Wilcke, W. (2018). Does plant diversity affect the water balance of established grassland systems? *Ecohydrology*, 11(4), doi:e1945. 10.1002/eco.1945

L44: Strange wording “overproduction of mixtures”. Do you mean overyielding?

**Response:** We agree. We will edit the text in the revised manuscript.

L48: Table 1 does not show that “most studies have focused only on the effects of plant mixtures on individual or several of these water cycle processes”. Please correct.

**Response:** Thanks for your comment. It is the supplementary Table S1 that lists the publications used in the meta-analysis. We will correct it in the revised manuscript.

Ls50-52: It would be beneficial if some specific examples of regional differences in the relationship between plant diversity and water cycle processes were presented in the introduction.

**Response:** We agree. The following examples will be added in the revised manuscript.

“However, existing studies have reported contradictory results or negligible effects of plant mixtures on soil water content as well as for other water cycle processes (Table 1). For example, Rahman et al. (2017) reported that average SWC in the intercropping was relatively greater compared to sole cropping. However, Gong et al. (2020) found that the average SWC in the intercropping was lower than corresponding monoculture in the 0-50 cm soil layer, while in the 50-100 cm soil layer, the SWC in the intercropping was higher. Regarding surface runoff processes, Fan et al. (2016) found that the runoff rate for intercropping corn and potatoes were smaller compared to those of monoculture. However, Machiwal

et al. (2021) shown that runoff rate from intercropping sorghum and cluster-bean may be greater than that from monoculture of cluster-bean.”

### Reference

- Gong, X., Dang, K., Lv, S., Zhao, G., Tian, L., Luo, Y., & Feng, B. (2020). Interspecific root interactions and water-use efficiency of intercropped proso millet and mung bean. *European Journal of Agronomy*, 115(126034). doi:10.1016/j.eja.2020.126034
- Fan, Z., An, T., Wu, K., Zhou, F., Zi, S., Yang, Y., ... Wu, B. (2016). Effects of intercropping of maize and potato on sloping land on the water balance and surface runoff. *Agricultural Water Management*, 166, 9-16. doi:10.1016/j.agwat.2015.12.006
- Machiwal, D., Kumar, S., Islam, A., Kumar, S., Jat, S. R., Vaishnav, M., & Dayal, D. (2021). Evaluating effect of cover crops on runoff, soil loss and soil nutrients in an Indian arid region. *Communications in Soil Science and Plant Analysis*, 52(14), 1669-1688. doi:10.1080/00103624.2021.1892726
- Rahman, T., Liu, X., Hussain, S., Ahmed, S., Chen, G., Yang, F., ... Yang, W. (2017). Water use efficiency and evapotranspiration in maize-soybean relay strip intercrop systems as affected by planting geometries. *PLoS ONE*, 12(e01783326). doi:10.1371/journal.pone.0178332
- L63 (and L 235): Misleading citation, Lange et al. 2015 and Chen et al. 2020 reported on increases soil organic matter content with plant diversity. Effects on soil water holding capacity are not assessed/discussed.

**Response:** Thanks for your comment. This part will be rewritten as follows in the revised manuscript to avoid misunderstanding.

"Although no studies have yet been conducted to determine the causes of varying effects of plant mixtures on water cycle processes, research on the relationship between plant diversity and ecosystem function suggests that this variability may depend on the type of plant mixture, planting period, soil characteristics, climate, and management practices (Augusto & Boča, 2022; Feng et al., 2022; Freschet et al., 2017; Mori et al., 2020; Toigo et al., 2021; Wright et al., 2017). For instance, Cheng et al. (2023) found that plant mixture on soil water content was species specific. Similarly, Ye et al. (2022) argued that inclusion of leguminous species significantly affect soil organic carbon content and quality"

### Reference

- Augusto, L., & Boca, A. (2022). Tree functional traits, forest biomass, and tree species diversity interact with site properties to drive forest soil carbon. *Nature Communications*, 13(1), 1097. <https://doi.org/10.1038/s41467-022-28748-0>
- Cheng, D., Jiao, L., Gao, G., Liu, J., Chen, W., Li, Z., Bai, Y., Wang, H., & Zhang, L. (2023). Effects of species mixtures on soil water storage in the semiarid hilly gully region. *Science of The Total Environment*, 897, 165409. <https://doi.org/10.1016/j.scitotenv.2023.165409>
- Feng, Y., Schmid, B., Loreau, M., Forrester, D. I., Fei, S., Zhu, J., ... Fang, J. (2022). Multispecies forest plantations outyield monocultures across a broad range of conditions. *Science (American Association for the Advancement of Science)*, 376(6595), 865-868. doi:10.1126/science.abm6363
- Freschet, G. T., Valverde Barrantes, O. J., Tucker, C. M., Craine, J. M., McCormack, M. L., Violle, C., ... Roumet, C. (2017). Climate, soil and plant functional types as drivers of global fine-root trait variation. *Journal of Ecology*, 105(5), 1182-1196. doi:10.1111/1365-2745.12769

- Mori, A. S., Cornelissen, J. H. C., Fujii, S., Okada, K. I., & Isbell, F. (2020). A meta-analysis on decomposition quantifies afterlife effects of plant diversity as a global change driver. *Nature Communications*, 11(1), 1-9. doi:10.1038/s41467-020-18296-w
- Toïgo, M., Castagneyrol, B., Jactel, H., Morin, X., & Meredieu, C. (2021). Effects of tree mixture on forest productivity: tree species addition versus substitution. *European Journal of Forest Research*. doi:10.1007/s10342-021-01432-6
- Wright, A. J., Wardle, D. A., Callaway, R., & Gaxiola, A. (2017). The overlooked role of facilitation in biodiversity experiments. *Trends in Ecology & Evolution*, 32(5), 383-390. doi:10.1016/j.tree.2017.02.011
- Ye, X., Luan, J., Wang, H., Zhang, Y., Wang, Y., Ma, J., & Liu, S. (2022). Tree species richness and N-fixing tree species enhance the chemical stability of soil organic carbon in subtropical plantations. *Soil Biology and Biochemistry*, 174, 108828. <https://doi.org/10.1016/j.soilbio.2022.108828>

Ls63-65: I disagree with this sentence. I think there is a good in-depth understanding of how plant diversity impacts biological and physical ecosystem properties, which in turn affect the water cycle. A global meta-study can increase the knowledge of general patterns and drivers among regions and vegetation types as well as differences among them.

**Response:** Thanks for your comment. This part will be rewritten as follows in the revised manuscript.

“Despite extensive research on how plant diversity affects water cycle processes, there is currently no global consensus on the overall impact of plant diversity on hydrological processes. Furthermore, plot-scale studies make it difficult for us to understand the impacts of different ecosystem types, soil characteristics, and management measures.”

Ls86-92: Based on Figure 1, 4 and Table S1, the ecosystem types and the water cycle processes are very unbalanced in this meta analyses. For instance, only a few grasslands are included in this study and just a few studies that investigate soil evaporation (7), throughfall (3), leaf transpiration (7). Though, it is possible to calculate effect sizes based on only a few studies/observations, I think this is a caveat for a general global meta-analysis.

**Response:** Thank you for your comment. In order to address this issue, we have included the recently published article and modify the search strategy, resulting in the inclusion of a greater number of grassland ecosystems in our analysis. The database now includes 24 grassland-related studies (an increase of 14). Among all the studies, 10, 4, and 13 studies respectively for soil evaporation, throughfall, and leaf transpiration, all of which have clearly increased compared with initial data. Here, we use the "fixed effects model" to calculate studies with fewer than three items, and clearly mark the number of studies and observations used in different analyses (Figure 4). All of these revisions will be reported in the revised manuscript.

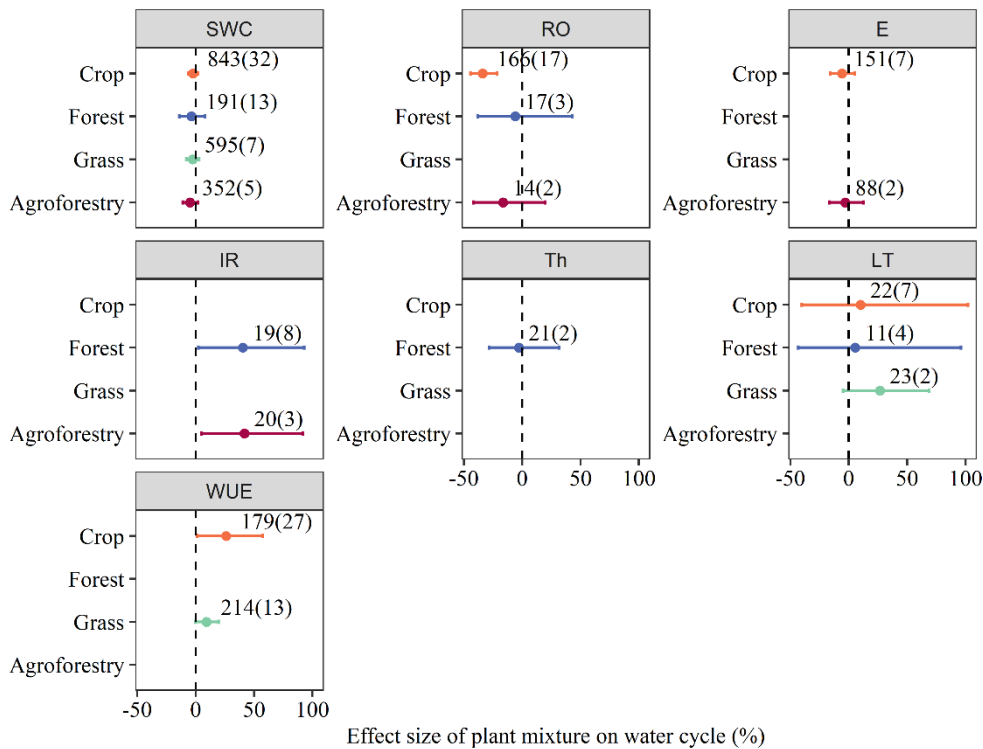

**FIGURE 4:** Water cycles in plant mixtures versus monocultures between ecosystem types. Means and horizontal error bars represent means and 95% confidence intervals (CIs) for plant mixture effects. The numbers outside the parentheses indicated the number of observations pairs, while inside the parentheses indicated the number of publications. SWC, RO, E, IR, LT, Th and WUE represent soil water content, runoff rate, evaporation, transpiration, throughfall and water use efficiency, respectively.

L99: “seed” or “species” sown?

**Response:** Thanks for your comment. Within grassland ecosystems, we calculate the proportion of each species in the mixture treatment based on the seed ratio.

L99: Please elaborate on the rationale and methods of the simulations.

**Response:** In this context, "Simulation" refers to indoor simulation experiments, including pot or soil column experiments. In the revised manuscript, 10 indoor experiments will be included for analysis, and "simulation" ecosystem type will be classified into crops (Ouyang et al., 2018, Wan et al., 2021, Zhu et al., 2023, Zhou et al., 2023) and grasslands (Nagase & Dunnett, 2012, Xu et al, 2022, Liu et al., 2021, Su et al., 2019, Zhang et al., 2017, Xu et al., 2023).

## References

- Ouyang, C., Wu, B., Wu, K., Yang, Y., Duan, Y., Zhang, X., ... De Beurs K M. (2018). Effect of ridging on soil erosion under maize and potato intercropping in southwest China. *Southwest China Journal of Agricultural Science*, 31(09), 1802-1810
- Wan, T. Y., Dong, X. W., Yu, L. H., Huang, H. L., Li, D. D., Han, H. Z., ... Tu, S. X. (2021). Comparative study of three *Pteris vittata*-crop intercropping modes in arsenic accumulation and phytoremediation efficiency. *Environmental Technology & Innovation*, 24. 10.1016/j.eti.2021.101923

- Zhu, S., Zhu, H., Cheng, Z., Zhou, R., Yang, Y., Wang, J., Wang, W., Wang, B., Tao, H., & Xiong, Y. (2023). Soil water and phosphorus availability determines plant-plant facilitation in maize-grass pea intercropping system. *Plant and Soil*, 482(1–2), 451–467. <https://doi.org/10.1007/s11104-022-05701-0>
- Zhou, Q., Gunina, A., Chen, J., Xing, Y., Xiong, Y., Guo, Z., & Wang, L. (2023). Reduction in soil CO<sub>2</sub> efflux through alteration of hydrothermal factor in milk vetch (*Astragalus sinicus* L.)-rapeseed (*Brassica napus* L.) intercropping system. *Frontiers in Plant Science*, 13, 1093507. <https://doi.org/10.3389/fpls.2022.1093507>
- Nagase, A., & Dunnett, N. (2012). Amount of water runoff from different vegetation types on extensive green roofs: Effects of plant species, diversity and plant structure. *Landscape and Urban Planning*, 104(3–4), 356–363. [10.1016/j.landurbplan.2011.11.001](https://doi.org/10.1016/j.landurbplan.2011.11.001)
- Xu Z., Wang D., Zhao Y., Liu W., & Xie K. (2022). Effects of drought-rehydration patterns on changes in photosynthetic efficiency and osmotic regulation of mixed forage. *Journal of Xinjiang Agricultural University*, 45(1), 9–16.
- Liu J., Wang S., Kang J., & Xu B. (2019). Effects of water and phosphorus supply on biomass production, water use efficiency and interspecific relationship of switchgrass and bushclover. *Acta Agrestia Sinica*, 06(27).
- Su Y., Gao X., Zhang H., & Zhu L. (2018). Effects of different water treatments on water use feature for monoculture and mixed cropping of gramineous and leguminous forages. *Journal of Henan Agricultural Sciences*, 47(2), 37–42. <https://doi.org/10.15933/j.cnki.1004-3268.2018.02.008>
- Zhang H., Zhu L., & Xu X. (2017). Effect of mixed sowing of graminaceous and leguminous forages under different water regimes in Ningxia central semi-arid belt. *Pratacultural Science*, 34(4), 777–787.
- Xu, R., Shi, W., Kamran, M., Chang, S., Jia, Q., & Hou, F. (2023). Grass-legume mixture and nitrogen application improve yield, quality, and water and nitrogen utilization efficiency of grazed pastures in the loess plateau. *Frontiers in Plant Science*, 14. <https://www.frontiersin.org/articles/10.3389/fpls.2023.1088849>

L101: Add “along the soil profile” after measurement interval.

**Response:** We agree. We will edit the text in the revised manuscript.

L105: Please rephrase. SOC is a component of the soil organic matter, not vice versa.

**Response:** We agree. The text will be revised as follow.

“soil organic carbon [SOC, soil organic matter data is converted to SOC by dividing 1.72 (Jian et al., 2020)]”.

## Reference

- Jian, J., Du, X., Reiter, M. S. & Stewart, R. D. (2020). A meta-analysis of global cropland soil carbon changes due to cover cropping. *Soil Biology and Biochemistry* 143, 107735. [doi:10.1016/j.soilbio.2020.107735](https://doi.org/10.1016/j.soilbio.2020.107735)

L106: What does “available” mean, “plant available”? Maybe use “mineral” instead.

**Response:** We agree. We will edit the text in the revised manuscript.

L142: Do you mean “maximum likelihood” instead of “restricted likelihood“.

**Response:** We agree. We will edit the text in the revised manuscript.

L162: This seems a bit selective. Based on Figure 4, only water use efficiency was different in croplands from grassland, but see my earlier comment the unbalanced number of studies for ecosystems.

**Response:** Thanks, we have revised it as “The effect size of plant mixtures on the water cycle was similar between ecosystem types, except for runoff process in croplands (FIGURE 4).”.

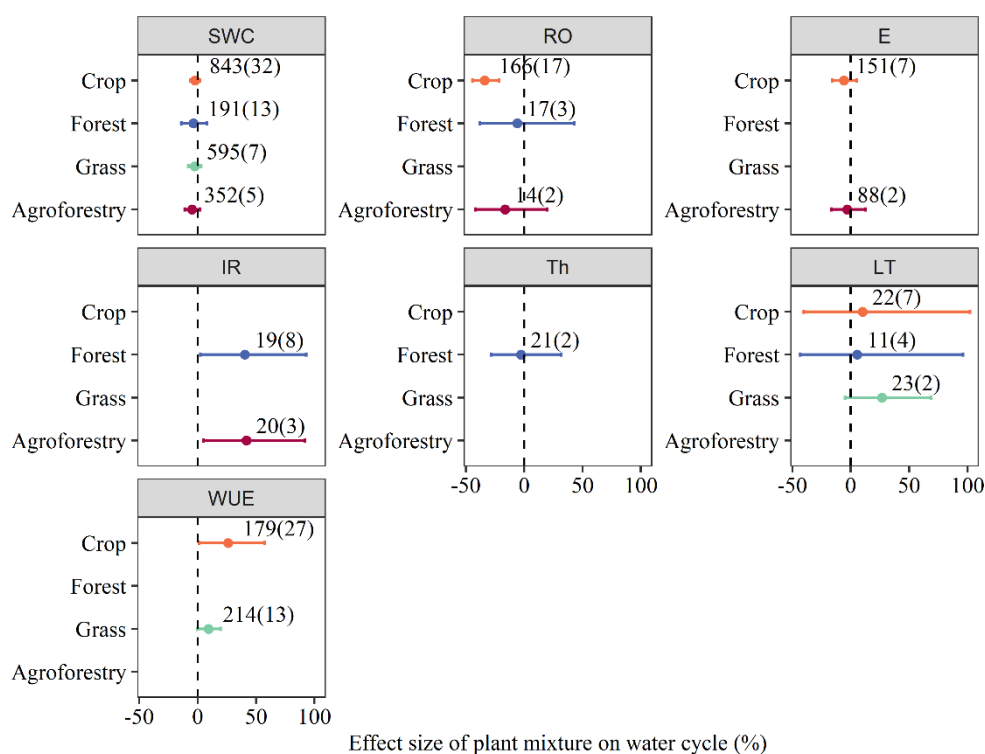

**FIGURE 4:** Water cycles in plant mixtures versus monocultures between ecosystem types. Means and horizontal error bars represent means and 95% confidence intervals (CIs) for plant mixture effects. The numbers outside the parentheses indicated the number of observations pairs, while inside the parentheses indicated the number of publications. SWC, RO, E, IR, LT, Th and WUE represent soil water content, runoff rate, evaporation, transpiration, throughfall and water use efficiency, respectively.

Ls163-164: Unclear. Please rephrase.

**Response:** We have revised it as “In contrast to forests and agroforestry ecosystems, crops have a shorter planting period (FIGURE 3). Furthermore, within the database we incorporated, the proportion of crop studies is notably high, accounting for 92 out of a total of 161 studies.”

L189: Unclear. Please rephrase.



**Response:** Based on the updated results, we have revised it as “The effect of plant mixture on SWC increased slightly with MAP in the whole soil layer”

Ls189-190: Unclear. Please rephrase. What exactly does the significant interaction term between MAT and sampling depth tell; different directions, different slopes?

**Response:** We have revised it as “MAT had a significant effect on SWC with soil depth (MAT×SD,  $P < 0.001$ ) (FIGURE 7). The significant interaction indicates that the impact of MAT on the effect size varies with soil depth.”

L211: Not clear what kind of plant communities were compared when assessing the effect of legumes on the diversity effect: non-legume monocultures vs non-legume mixtures, legume monocultures vs legume mixtures, non-legume monocultures vs. legume mixtures,... This should be defined.

**Response:** Thanks for your comments. The impact of hybrid legume crops is not compared in a single study, but rather each effect value is categorized into two types: one with legume plants (Y) and the other without legume plants (N). We analyze the impact of legume plants by comparing studies that include legume plants with those that do not.

L239: Delete “and”.

**Response:** Thanks for your comments. The phrase "biodiversity and ecosystem functioning" is commonly used in the study of biodiversity and ecosystem functions, as shown in the literature below.

## References

Tilman, D., Isbell, F., & Cowles, J. M. (2014). Biodiversity and Ecosystem Functioning. *Annual Review of Ecology, Evolution, and Systematics*, 45(1), 471–493. <https://doi.org/10.1146/annurev-ecolsys-120213-091917>

Hector, A., & Bagchi, R. (2007). Biodiversity and ecosystem multifunctionality. *Nature*, 448(7150), 188–190. <https://doi.org/10.1038/nature05947>

Loreau, M., Naeem, S., Inchausti, P., Bengtsson, J., Grime, J. P., Hector, A., Hooper, D. U., Huston, M. A., Raffaelli, D., Schmid, B., Tilman, D., & Wardle, D. A. (2001). Biodiversity and ecosystem functioning: Current knowledge and future challenges. *Science*, 294(5543), 804–808. <https://doi.org/10.1126/science.1064088>

Ls257-262: I suggest to remove the section on biotic interactions/facilitation, as this is not considered in this study and some more elaborated discussions on how biotic interactions impact water processes are needed.

**Response:** We agree. We will delete the section on biotic interactions/facilitation in the revised paper. Furthermore, more elaborated discussions on how biotic interactions impact water processes will be added in the revised manuscript as follows.

“Mixed planting creates a suitable microclimate that promotes a healthy water cycle by improving the living environment of neighboring species (Figure 11A1, A2) (Aguirre et al., 2021). For instance, in mixed systems, the dense canopies of tall plants absorb more radiation, enhancing plant transpiration,

maintaining lower understory temperatures, and reducing the inhibitory effect of high temperatures on the transpiration of low-growing species (Guimarães Steinicke et al., 2021). Different species of plants in mixed systems can also transmit nutrients and information through root exudates and mycelium, with neighboring plants utilizing these resources and producing certain feedback, such as changes in plant morphology (Yu et al., 2021). Studies have shown that in mixed-species systems, the biomass of plant fine roots is on average 28.4% higher than in monocultures (Ma et al., 2016). The increase in root biomass can enhance soil infiltration and reduce runoff, with the fine root systems demonstrating superior erosion resistance and runoff reduction effects compared to main root plants (Vannoppen et al., 2015; Wang et al., 2021). Moreover, the greater amount of litter in mixed systems could also be a significant factor in reducing runoff. Species asynchrony is a crucial mechanism for enhancing biodiversity and ecosystem function relationships (Zhao et al., 2022). Compared to monocultures, mixed-species systems have a longer vegetation cover duration, which may play a significant role in reducing soil evaporation and surface runoff.”

### Reference

- Aguirre, B. A., Hsieh, B., Watson, S. J., & Wright, A. J. (2021). The experimental manipulation of atmospheric drought: Teasing out the role of microclimate in biodiversity experiments. *Journal of Ecology*, 109(5), 1986-1999. doi:10.1111/1365-2745.13595
- Guimarães-Steinicke, C., Weigelt, A., Ebeling, A., Eisenhauer, N., & Wirth, C. (2022). Diversity effects on canopy structure change throughout a growing season in experimental grassland communities. *Remote Sensing*, 14(7), 1557. doi:10.3390/rs14071557
- Ma, Z., & Chen, H. Y. H. (2016). Effects of species diversity on fine root productivity in diverse ecosystems: A global meta-analysis. *Global Ecology and Biogeography*, 25(11), 1387–1396. <https://doi.org/10.1111/geb.12488>
- Vannoppen, W., Vanmaercke, M., De Baets, S., & Poesen, J. (2015). A review of the mechanical effects of plant roots on concentrated flow erosion rates. *Earth-Science Reviews*, 150, 666–678. <https://doi.org/10.1016/j.earscirev.2015.08.011>
- Yu, R., Lambers, H., Callaway, R. M., Wright, A. J., & Li, L. (2021). Belowground facilitation and trait matching: two or three to tango? *Trends in Plant Science*. 26(12), 1227-1235. doi:10.1016/j.tplants.2021.07.014
- Zhao, L., Wang, S., Shen, R., Gong, Y., Wang, C., Hong, P., & Reuman, D. C. (2022). Biodiversity stabilizes plant communities through statistical-averaging effects rather than compensatory dynamics. *Nature Communications*, 13(1), 7804. <https://doi.org/10.1038/s41467-022-35514-9>

Figures and Tables: Please provide information on the abbreviations in all figures (e.g. missing in Figure 2 and Figure S3, Table S1), so that all figures can be understood on a stand-alone basis.

**Response:** We agree. We will give the full name of all abbreviations in the figure caption for all figures in the revised manuscript.

Figure 2: Please rephrase the captions, unclear.

**Response:** We agree. The caption of the figure will be edited as follows in the revised manuscript.

“Figure 2: Effect size of plant mixtures on water cycle processes versus monocultures. Solid circles mean significant effect ( $P < 0.05$ ), hollow circles mean no significant effect. The numbers outside the

parentheses indicated the number of observations pairs, while inside the parentheses indicated the number of studies. SWC, RO, E, IR, LT, Th and WUE represent soil water content, runoff rate, evaporation, transpiration, throughfall and water use efficiency, respectively.”

Figure 3b: I am wondering if the trendline would be similar, if the single observation at 15 years is not included. The huge confidence interval is also remarkable.

**Response:** In FIGURE 3, data points with longer planting years generally attributes to forest ecosystems. Analyzing by different ecosystems can effectively address the impact of planting years in different ecosystems on the overall results (FIGURE S3). As you mentioned, due to data imbalance, there is a significant discrepancy between the overall results in Figure 3 and the results of different ecosystem types. Some trends, such as throughfall (FIGURE 3E), cannot be attributed to the influence of planting years. After modifying according to your suggestion, it can better reflect the actual situation.

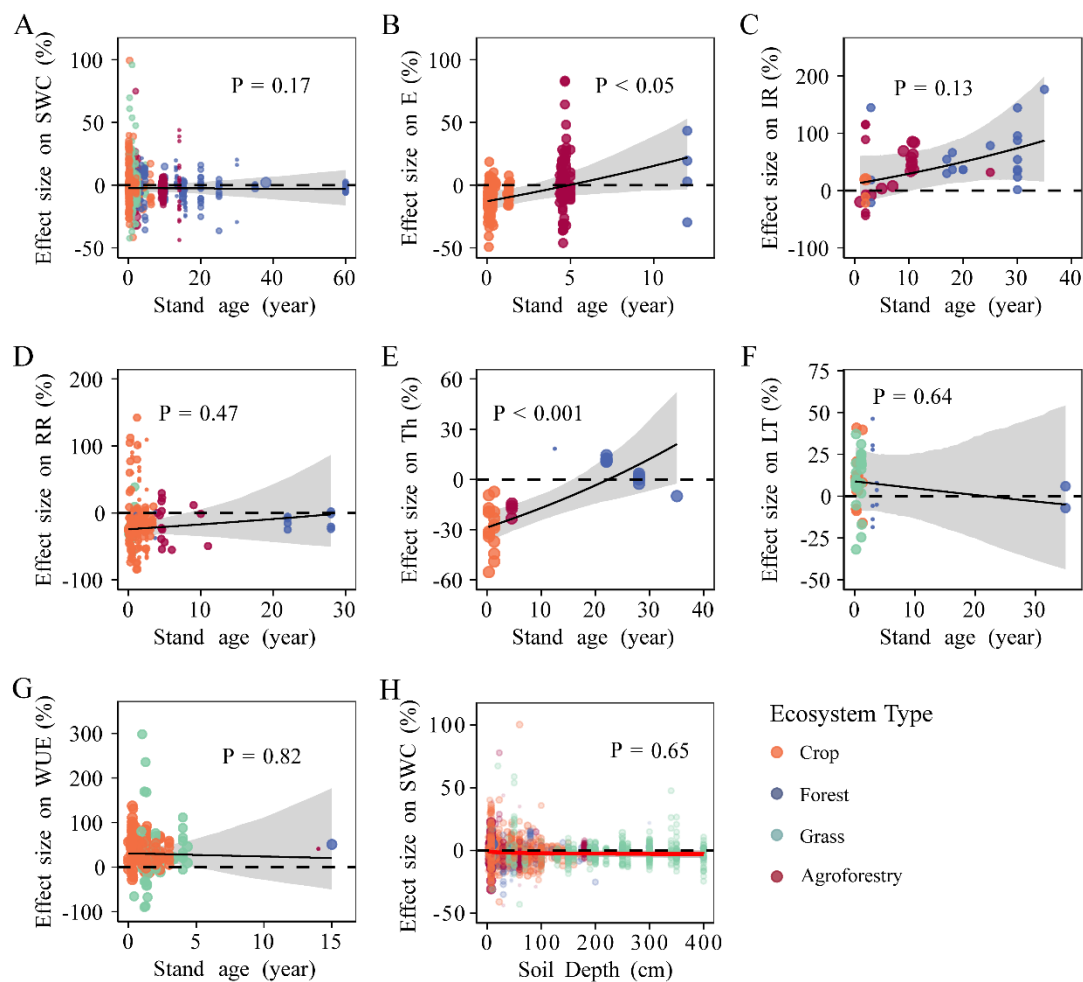

**FIGURE 3** Plant mixture effect on the water cycle processes in terms of plant stand age and soil moisture measurement depth. A-G shown plant stand age, H shown soil depth. SWC, RO, E, IR, LT, Th and WUE represent soil water content, runoff rate, evaporation, transpiration, throughfall and water use efficiency, respectively. The black lines are fitted effect sizes, with bootstrapped 95% confidence intervals shaded in grey. The size of circles ( $W_r$ ) represents the relative weights of corresponding observations.

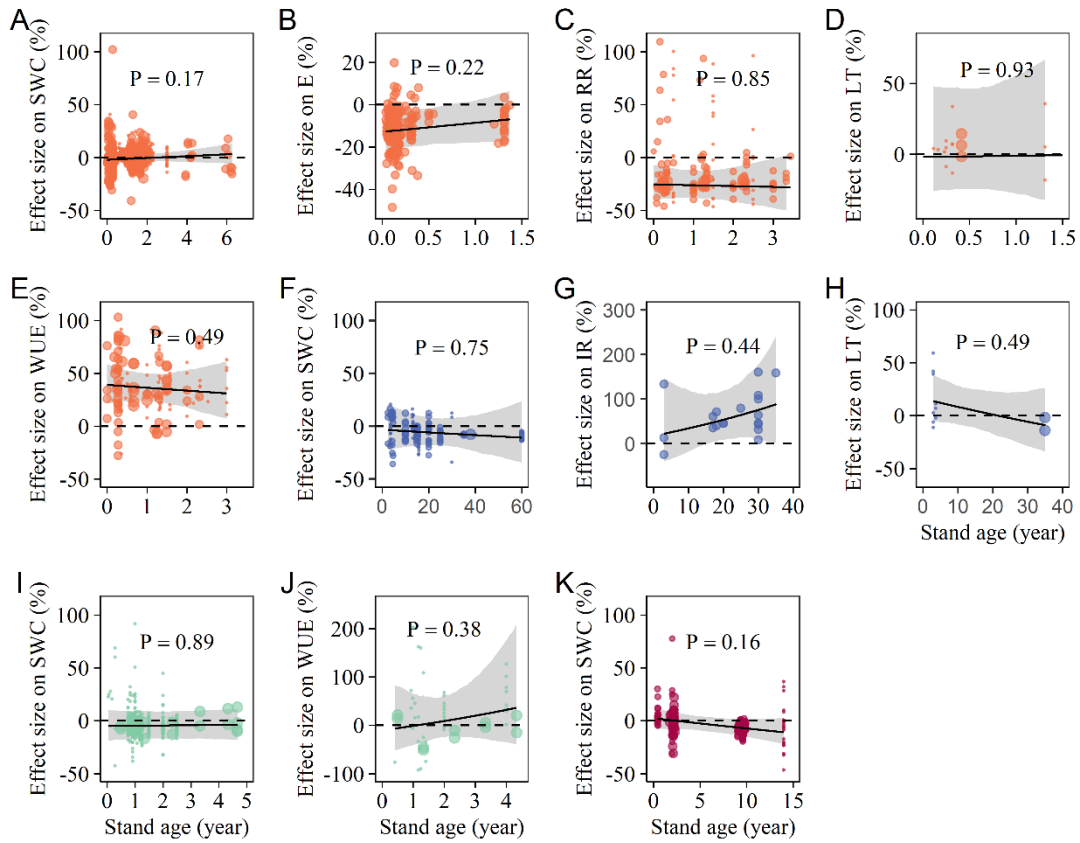

**FIGURE S4** Effect of plant mixture on water cycle processes in terms of stand age. A-E denote crops, F-H denote forests, I-J denote grasslands, and K denote agroforestry, respectively. SWC, RO, E, IR, LT, Th and WUE represent soil water content, runoff rate, evaporation, transpiration, throughfall and water use efficiency, respectively. The black lines are fitted effect sizes, with bootstrapped 95% confidence intervals shaded in grey. The size of circles represents the relative weights of corresponding observations. Figures 5 & 6: What is the “relative weight”, how and why was it calculated? Also, the red lines in most panels do not properly represent the distribution of points (observations), in particular in the panels 100-200mm and 200-500mm. Please explain.

**Response:** "The relative weight" refers to the weight we assign to each study when conducting our analysis. Here, the number of replications was used to calculate the relative weight (Pittelkow et al., 2015).

$$Wr = \frac{(N_c \times N_t)}{(N_c + N_t)} \quad (1)$$

where  $Wr$  is the weight for observed values and  $N_t$  and  $N_c$  are the number of replications in mixtures and monocultures, respectively.

The following model was employed to test the effects of MAP, MAT and soil depth (SD) on the lnRR of SWC, RO, IR, E, Th, LT, and WUE:

$$\ln RR = \beta_0 + \beta_1 \times MAP + \beta_2 \times SD + \beta_3 \times MAP \times SD + \pi_{study} + \varepsilon \quad (2)$$

$$\ln RR = \beta_0 + \beta_1 \times MAT + \beta_2 \times SD + \beta_3 \times MAT \times SD + \pi_{study} + \varepsilon \quad (3)$$

where  $\beta_s$  are the coefficients to be estimated; *MAP* is mean annual precipitation; *MAT* is mean annual temperature;  $\pi_{study}$  is the random effect factor of the study, and  $\varepsilon$  is the sampling error.

In our analysis, we took into account the interaction between MAP or MAT and soil depth, as indicated by *MAP*×*SD* and *MAT*×*SD* in equations 2 and 3. The regression slopes for different soil layers are influenced not only by the data points of the current layer but also by the results of other layers. Our findings indicate significant interaction effects of 0.018 ( $p < 0.001$ ) for *MAP*×*SD* and 0.017 ( $p < 0.001$ ) for *MAT*×*SD*. As a result, the regression slopes for the 100-200cm and 200-500cm soil depths display inconsistencies with the data points. This discrepancy also appeared in our analysis results after updating our data, and we conducted a grouped regression analysis, as depicted in the subsequent figure.

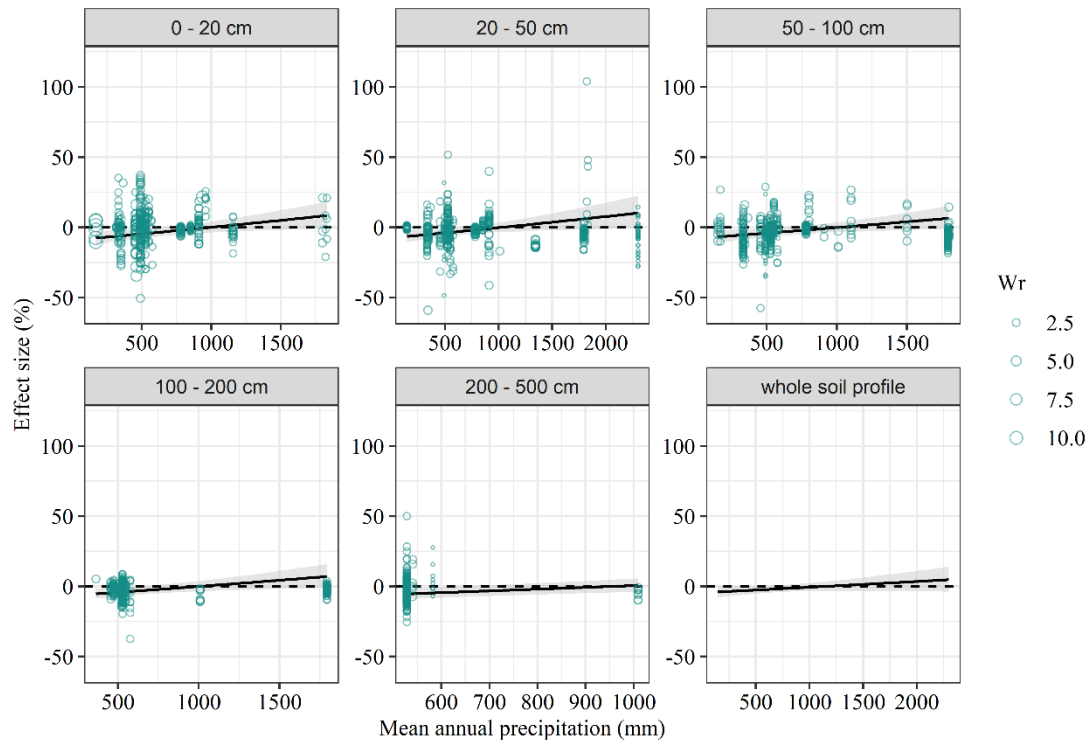

**FIGURE 6:** Interactive effects of mean annual precipitation (*MAP*) and soil moisture measurement depth (*SD*) on the effect size of plant mixture on soil water content. The black line represents the estimated mean response, with bootstrapped 95% confidence intervals shaded in blue. The figure was plotted based on the most parsimonious models derived from Equation 7. The size of circles (*Wr*) represents the relative weights of corresponding observations.

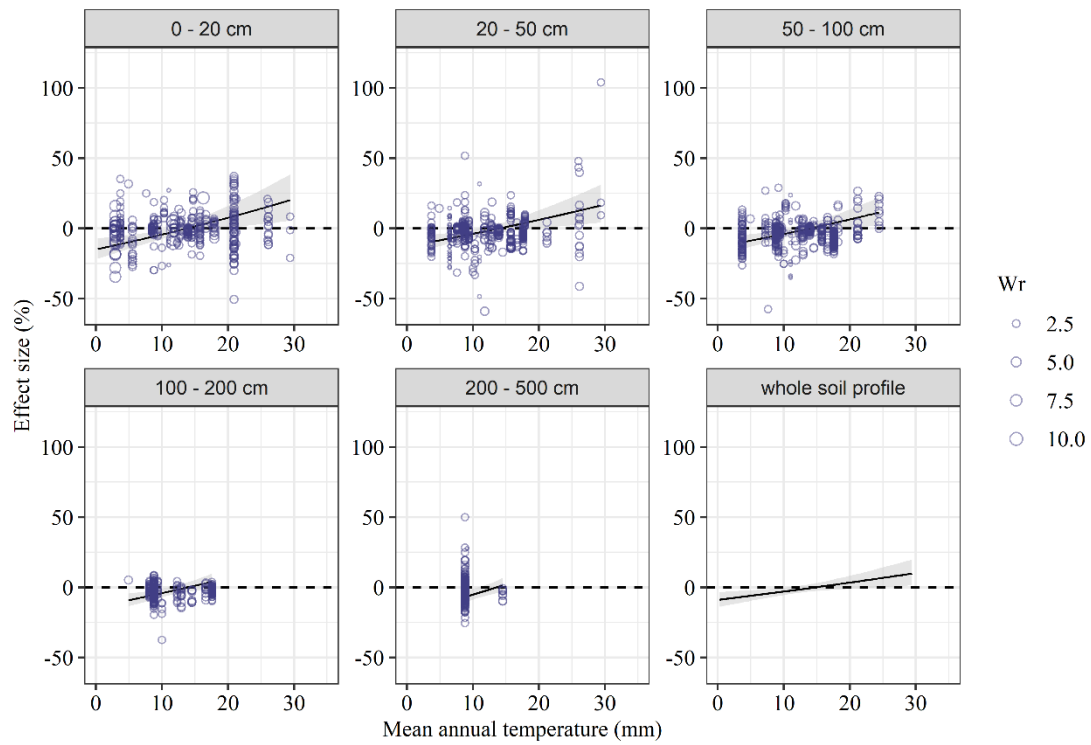

**FIGURE 7:** Interactive effects of mean annual temperature (MAT) and soil depth (SD) on the effect size of plant mixture on soil water content. The **black** line represents the estimated mean response, with bootstrapped 95% confidence intervals shaded in blue. The figure was plotted based on the most parsimonious models derived from Equation 7. The size of circles ( $W_r$ ) represents the relative weights of corresponding observations.

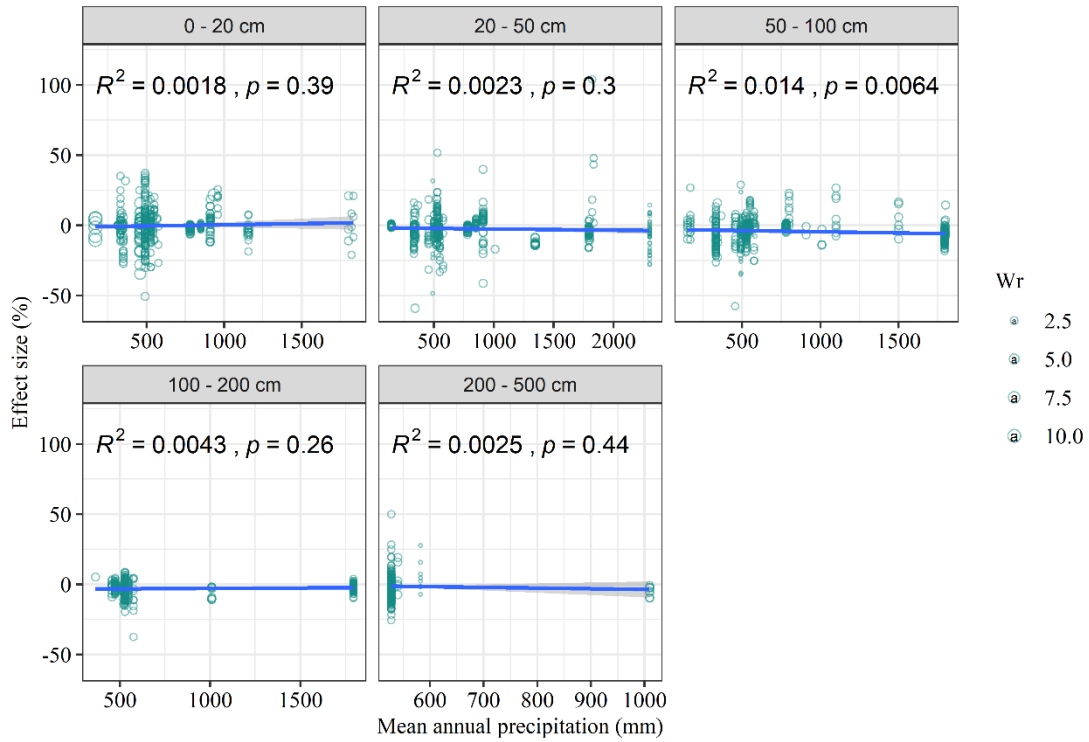

**FIGURE** Effects of MAP on the effect size of plant mixture on SWC. The blue line represents the estimated mean response, with bootstrapped 95% confidence intervals shaded in grey. The figure was plotted based on the liner models derived from different SD subgroup. The size of circles ( $W_r$ ) represents the relative weights of corresponding observations.

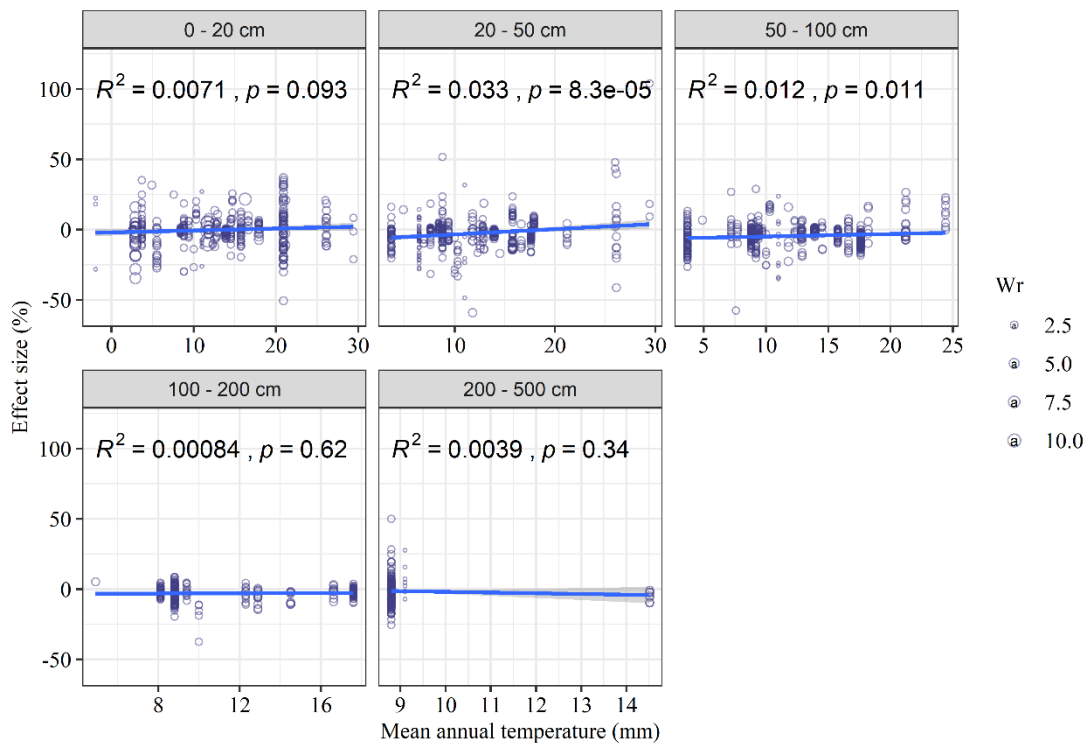

**FIGURE** Effects of MAT on the effect size of plant mixture on SWC. The blue line represents the estimated mean response, with bootstrapped 95% confidence intervals shaded in grey. The figure was plotted based on the linear models derived from different SD subgroup. The size of circles ( $W_r$ ) represents the relative weights of corresponding observations.

### Reference

Pittelkow, C. M., Liang, X., Linquist, B. A., van Groenigen, K. J., Lee, J., Lundy, M. E., ... van Kessel, C. (2015). Productivity limits and potentials of the principles of conservation agriculture. *Nature*, 517(7534), 365-368. doi:10.1038/nature13809

Figure 9: Check letters on the panels. In the captions, add carbon to “soil organic content”.

**Response:** Thanks for your suggestion. We will edit this figure in the revised manuscript.



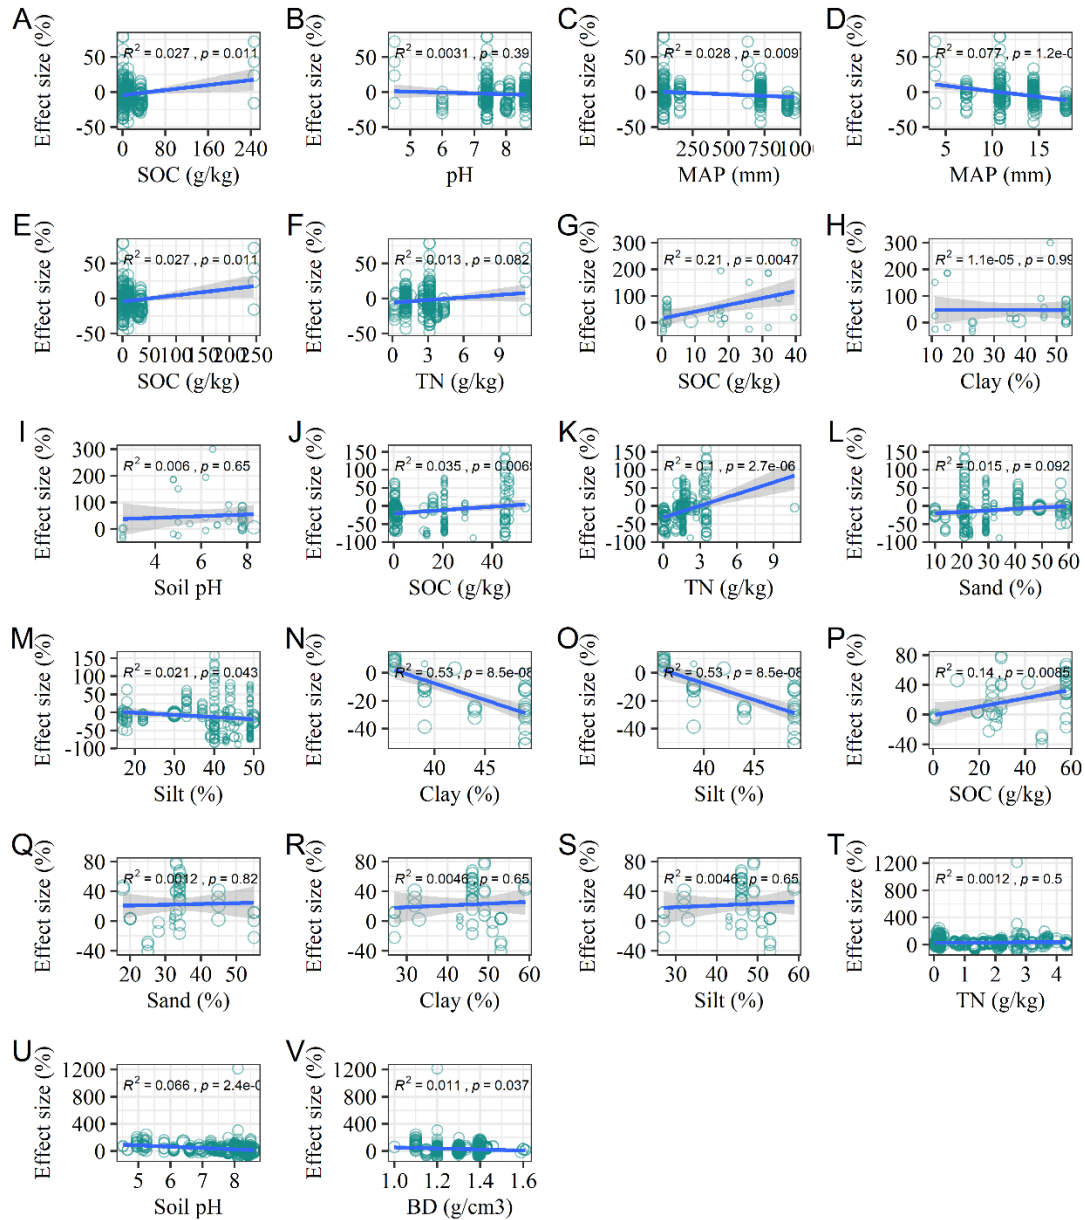

**Figure S5** Plant mixture effects on water cycle processes in relation to influencing factors, A, SWC related to SOC; B, SWC related to pH; C, E related to MAP; D, E related to MAT; E, E related to SOC; F, E related to TN; G, IR related to SOC; H, IR related to Clay; I, IR related to pH; J, RO related to SOC; K, RO related to TN; L, RO related to Sand; M, RO related to Silt; N, Th related to Clay; O, Th related to Silt; P, LT related to SOC; Q, LT related to Sand; R, LT related to Clay; S, LT related to Silt; T, WUE related to TN; U, WUE related to pH; V, WUE related to BD. SWC, RO, E, IR, LT, Th and WUE represent soil water content, runoff rate, evaporation, transpiration, throughfall and water use efficiency, respectively.

Table S1: Typo in the captions: should be “throughfall”. Also, three of the 88 studies do not have any entry in the responses of water cycle processes to plant mixtures? In addition, I strongly suggest to include information on ecosystem types, the studies deal with.

**Response:** Thanks. We will complete the missing information in Table S1, and add information on ecosystem types in Table S1.

**Table S1** Reviewed references of the responses of water cycle processes to plant mixtures in this meta-analysis.

| Reference ID | Reference                 | Ecosystem type | SWC | IR  | RO  | E   | L T | T h | WU E |
|--------------|---------------------------|----------------|-----|-----|-----|-----|-----|-----|------|
| 1            | Altinalmazis et al., 2020 | Forest         | Yes |     |     |     |     |     |      |
| 2            | An et al., 2014           | Crop           |     |     | Yes |     |     |     |      |
| 3            | An et al., 2019           | Crop           |     |     | Yes |     |     |     |      |
| 4            | Ashilenje et al., 2023    | Crop           | Yes |     |     |     |     |     |      |
| 5            | Chai et al., 2011         | Crop           |     |     |     | Yes |     |     |      |
| 6            | Chen & Zheng, 2018        | Crop           |     |     |     | Yes |     |     |      |
| 7            | Chen et al., 2008         | Forest         | Yes |     | Yes |     | Yes |     |      |
| 8            | Chen X et al., 2015       | Crop           |     |     | Yes |     |     |     |      |
| 9            | Chen G et al., 2015       | Crop           |     |     |     |     |     |     | Yes  |
| 10           | Chen et al., 2016         | Forest         |     |     |     |     | Yes |     |      |
| 11           | Chen et al., 2020         | Forest         |     | Yes |     |     |     |     |      |
| 12           | Cheng et al., 2022        | Forest         | Yes |     |     |     |     |     |      |
| 13           | Chimonyo et al., 2016     | Crop           |     |     |     |     |     |     | Yes  |
| 14           | Chirwa et al., 2003       | Forest         |     | Yes |     |     |     |     |      |
| 15           | Collins et al., 2017      | Agroforestry   | Yes |     |     |     |     |     |      |
| 16           | Ding et al., 2015         | Agroforestry   |     |     | Yes |     |     | Yes |      |
| 17           | Du et al., 2017           | Crop           |     |     | Yes |     |     |     |      |
| 18           | Fan & Wu et al., 2016     | Crop           | Yes |     |     |     |     |     |      |

|    |                         |              |     |     |     |
|----|-------------------------|--------------|-----|-----|-----|
| 19 | Fan et al., 2016        | Crop         | Yes | Yes | Yes |
| 20 | Fang et al., 2020       | Forest       |     | Yes |     |
| 21 | Forrester et al., 2010  | Forest       | Yes |     | Yes |
| 22 | Fox et al., 2011        |              |     | Yes |     |
| 23 | Franco et al., 2021     | Crop         |     |     | Yes |
| 24 | Gao et al., 2008        | Crop         |     |     | Yes |
| 25 | Gao et al., 2010        | Crop         | Yes |     |     |
| 26 | Gathumbi et al., 2002   | Agroforestry | Yes |     |     |
| 27 | Ghahremani et al., 2021 | Crop         |     | Yes |     |
| 28 | Gomes et al., 2014      | Crop         |     |     | Yes |
| 29 | Gong et al., 2020       | Crop         |     |     | Yes |
| 30 | Grossiord et al., 2013  | Forest       |     |     | Yes |
| 31 | Guo et al., 2019        | Forest       |     | Yes |     |
| 32 | Han et al., 2022        | Crop         | Yes |     | Yes |
| 33 | He et al., 2022         | Crop         |     |     | Yes |
| 34 | Hussain et al., 2023    | Crop         | Yes |     | Yes |
| 35 | Jahansooz et al., 2007  | Crop         | Yes |     | Yes |
| 36 | Jakhar et al., 2015     | Crop         |     | Yes | Yes |
| 37 | Jiang et al., 2007      | Forest       |     | Yes |     |
| 38 | Jonard et al., 2008     | Forest       | Yes |     |     |
| 39 | Khan & Mcvay, 2019      | Crop         | Yes |     |     |
| 40 | Kherif et al.,          | Crop         |     |     | Yes |

| 2023 |                          |        |     |     |
|------|--------------------------|--------|-----|-----|
| 41   | Khokhar et al., 2021     | Crop   | Yes |     |
| 42   | Li et al., 2016          | Forest | Yes |     |
| 43   | Li et al., 2019          | Grass  | Yes |     |
| 44   | Li et al., 2020          | Crop   | Yes | Yes |
| 45   | Li et al., 2021          | Crop   |     | Yes |
| 46   | Liu et al., 2013         | Crop   | Yes |     |
| 47   | Liu et al., 2019         | Grass  |     | Yes |
| 48   | Liu et al., 2021         | Forest | Yes |     |
| 49   | Luo et al., 1999         | Forest | Yes |     |
| 50   | Luo et al., 2004         | Forest |     | Yes |
| 51   | Ma et al., 2019          | Crop   | Yes |     |
| 52   | Ma et al., 2020          | Crop   | Yes |     |
| 53   | Ma et al., 2022          | Grass  |     | Yes |
| 54   | Machiwal et al., 2021    | Crop   | Yes |     |
| 55   | Mao et al., 2012         | Crop   | Yes |     |
| 56   | Mbanyele et al., 2021    | Crop   |     | Yes |
| 57   | Mohsenabadi et al., 2008 | Crop   |     | Yes |
| 58   | Moore et al., 2011       | Forest | Yes |     |
| 59   | Mu et al., 2013          | Crop   |     | Yes |
| 60   | Nagase & Dunnett, 2012   | Grass  | Yes |     |
| 61   | Nelson et al., 2018      | Crop   | Yes |     |
| 62   | Niu et al., 2018         | Grass  |     | Yes |
| 63   | Nyawade et               | Crop   | Yes | Yes |

|    |                          |              |     |     |     |     |     |
|----|--------------------------|--------------|-----|-----|-----|-----|-----|
|    | al., 2019                |              |     |     |     |     |     |
| 64 | Ogindo & Walker, 2005    | Crop         | Yes |     |     |     |     |
| 65 | Ouyang et al., 2017      | Crop         |     |     | Yes |     |     |
| 66 | Ouyang et al., 2018      | Crop         |     |     | Yes |     |     |
| 67 | Pankou et al., 2021      | Crop         |     |     |     |     | Yes |
| 68 | Powell & Bork, 2004      | Agroforestry | Yes |     |     |     |     |
| 69 | Rahman & Ye et al., 2017 | Crop         | Yes |     | Yes | Yes | Yes |
| 70 | Rahman et al., 2017      | Crop         | Yes |     | Yes | Yes | Yes |
| 71 | Ren et al., 2019         | Crop         | Yes |     |     |     | Yes |
| 72 | Ren et al., 2021         | Crop         | Yes |     |     |     |     |
| 73 | Schume et al., 2004      | Forest       | Yes |     |     |     |     |
| 74 | Shang et al., 2022       | Crop         | Yes |     |     |     | Yes |
| 75 | Shen et al., 2023        | Crop         |     |     |     |     | Yes |
| 76 | Shu et al., 2014         | Grass        | Yes |     |     |     |     |
| 77 | Singh et al., 2020       | Crop         |     |     | Yes |     |     |
| 78 | St Aime et al., 2020     | Crop         | Yes |     |     |     | Yes |
| 79 | Su et al., 2018          | Grass        |     |     |     |     | Yes |
| 80 | Sun et al., 2014         | Crop         | Yes |     |     |     |     |
| 81 | Te et al., 2023          | Crop         |     |     |     |     | Yes |
| 82 | Tetteh et al., 2019      | Agroforestry | Yes | Yes |     |     |     |
| 83 | Thomas et al., 2021      | Forest       | Yes |     |     |     |     |
| 84 | Wan et al., 2021         | Crop         |     |     |     | Yes |     |
| 85 | Wan et al.,              | Grass        | Yes |     |     |     |     |

|     |                     |              |     |     |     |
|-----|---------------------|--------------|-----|-----|-----|
|     | 2022                |              |     |     |     |
| 86  | Wang & Chen, 2015   | Crop         |     | Yes |     |
| 87  | Wang & Wang, 2016   | Grass        | Yes |     |     |
| 88  | Wang P et al. 2022  | Agroforestry |     |     | Yes |
| 89  | Wang et al., 2008   | Forest       |     | Yes |     |
| 90  | Wang et al., 2011   | Crop         |     |     | Yes |
| 91  | Wang L et al., 2015 | Agroforestry |     | Yes |     |
| 92  | Wang H et al., 2015 | Grass        |     |     | Yes |
| 93  | Wang X et al., 2016 | Crop         |     | Yes |     |
| 94  | Wang J et al., 2016 | Grass        | Yes |     |     |
| 95  | Wang et al., 2017   | Forest       |     |     | Yes |
| 96  | Wang et al., 2020   | Crop         | Yes |     |     |
| 97  | Wang W et al., 2022 | Forest       |     |     | Yes |
| 98  | Wang et al., 2023   | Crop         | Yes |     |     |
| 99  | Wu et al., 2015     | Crop         |     | Yes |     |
| 100 | Wu et al., 2016     | Grass        |     | Yes |     |
| 101 | Xiong et al., 2016  | Crop         |     |     | Yes |
| 102 | Xu Z et al, 2022    | Grass        |     |     | Yes |
| 103 | Xu et al., 2008     | Grass        | Yes |     | Yes |
| 104 | Xu et al., 2019     | Agroforestry |     |     | Yes |
| 105 | Xu et al.,2008      | Grass        | Yes |     | Yes |
| 106 | Xu et al., 2023     | Crop         | Yes |     | Yes |
| 107 | Xu W et al.,        | Grass        |     |     | Yes |

|     |                         |              |     |     |     |     |
|-----|-------------------------|--------------|-----|-----|-----|-----|
|     | 2022                    |              |     |     |     |     |
| 108 | Yang et al.,<br>2023    | Forest       | Yes |     |     |     |
| 109 | Ye et al.,<br>2015      | Crop         | Yes |     | Yes | Yes |
| 110 | Yun et al.,<br>2021     | Forest       | Yes | Yes |     |     |
| 111 | Žalac et al.,<br>2023   | Agroforestry | Yes |     |     | Yes |
| 112 | Zhang et al.,<br>2005   | Forest       |     | Yes |     |     |
| 113 | Zhang et al.,<br>2008   | Grass        |     |     |     | Yes |
| 114 | Zhang et al.,<br>2017   | Crop         | Yes |     |     |     |
| 115 | Zhang et al.,<br>2017   | Grass        |     |     |     | Yes |
| 116 | Zhang et al.,<br>2021   | Grass        |     |     |     | Yes |
| 117 | Zhang et al.,<br>2022   | Crop         |     |     | Yes |     |
| 118 | Zhang et al.,<br>2022   | Grass        |     |     | Yes |     |
| 119 | Zhang et al.,<br>2022   | Forest       |     |     | Yes |     |
| 120 | Zhao X et al.,<br>2012  | Crop         | Yes |     |     |     |
| 121 | Zhao Y et al.,<br>2012b | Agroforestry |     |     | Yes |     |
| 122 | Zhao et al.,<br>2016    | Forest       | Yes |     |     |     |
| 123 | Zhao et al.,<br>2021    | Forest       | Yes |     |     |     |
| 124 | Zhao et al.,<br>2022    | Crop         |     |     | Yes |     |
| 125 | Zhao Y et al.,<br>2012a | Crop         | Yes |     |     |     |
| 126 | Zheng &<br>Chen, 2017   | Crop         |     |     | Yes | Yes |
| 127 | Zhou et al.,<br>2019    | Crop         | Yes |     |     |     |
| 128 | Zhou et al.,<br>2023    | Crop         | Yes |     |     |     |

|     |                     |       |     |
|-----|---------------------|-------|-----|
| 129 | Zhu et al.,<br>2023 | Crop  | Yes |
| 130 | Zuo et al.<br>2008  | Grass | Yes |

Note: SWC: soil water content ( $\text{cm}^3 \text{m}^{-3}$ ); IR: steady infiltration rate ( $\text{mm min}^{-1}$ ); RO: runoff (mm); E: soil evaporation ( $\text{mm day}^{-1}$ ); LT: leaf transpiration ( $\text{mmol m}^{-2} \text{s}^{-1}$ ); Th: throughfall (mm); WUE: water use efficiency ( $\text{g m}^{-2} \text{mm}^{-1}$ )

## Reference

- Altinalmazis-Kondylis, A., Muessig, K., Meredieu, C., Jactel, H., Augusto, L., Fanin, N., & Bakker, M. R. (2020). Effect of tree mixtures and water availability on belowground complementarity of fine roots of birch and pine planted on sandy podzol. *Plant and Soil*, 457(1-2SI), 437-455. 10.1007/s11104-020-04741-8
- An, T., He, J., Yang, Y., Han, X., Zhou, F., & Wu, B. (2014). Benefits of soil and water conservation by sweet maize intercropping with different mulches on sloping land. *Bulletin of Soil and Water Conservation*, 34(01), 31-33
- An, T., Zhou, F., Wu, Z., He, C., Li, K., Y, Y., Wu, B. (2019). Effect of crop intercropping on soil and water conservation in arable sloping land. *Research of Soil and Water Conservation*, 26(02), 17-22.
- Ashilenje, D. S., Amombo, E., Hirich, A., Devkota, K. P., Kouisni, L., & Nilahyane, A. (2023). Irrigated barley–grass pea crop mixtures can revive soil microbial activities and alleviate salinity in desertic conditions of southern Morocco. *Scientific Reports*, 13(1), 13174. <https://doi.org/10.1038/s41598-023-40337-9>
- Chai, Q., Yu, A., Chen, G., & Huang, P. (2011). Soil evaporation under sole cropping and intercropping systems and the main driving factors. *Chinese Journal of Eco-Agriculture*, 19(06), 1307-1312
- Chen, H., & Zheng, L. (2018). Evaporation of wheat/corn intercropping and its main impact factors in oasis irrigation areas. *Gansu Agricultural Science and Technology*, (11), 79-83
- Chen, J., Liu, W., Zhang, X., Zhang, B., Wang, B., & Yang, Y. (2008). Soil and water conservation benefits and suitability of different forestation on trees in tableland and -gully area of the Loess Plateau. *Journal of Northwest A&F University (Nat. Sci. Ed.)*, (06), 97-104
- Chen, X., Fan, M., Wang, Z., Ma, Z., & Li, Y. (2015). Effect of different planting patterns on soil and water conservation of sloping cropland in central Yunnan. *Journal of Soil and Water Conservation*, 29(04), 48-52
- Chen, G., Chai, Q., Huang, G., Yu, A., Feng, F., Mu, Y., ... Huang, P. (2015). Belowground interspecies interaction enhances productivity and water use efficiency in maize-pea intercropping systems. *Crop Science*, 55(1), 420-428. 10.2135/cropsci2014.06.0439
- Chen, D., Qu, G., Chen, J., Liu, G., Li, Q., Zhang, S., & Zheng, Y. (2016). Effect of different weather conditions on photosynthetic characteristics of juvenile plantations of four afforestation tree species in yunnan province. *Journal of southwest forestry university*, 36(05), 32-38
- Chen, C., Zhang, J., Lei, G., Ding, X., Liu, X., & Qi, L. (2020). Interception of N and P by the buffer zone of waterfront vegetation in Danjiangkou Reservoir area of Hubei. *Science Silvae Science*, 56(09), 12-20
- Chen Q., Zhou X., Zhu H., Wen Y., Wang L., Shao W., & Zhang X. (2022). Effects of a mixture of Eucalyptus and Castanopsis hystrix on soil nutrients and understory plant functional groups.



- Guihaia*, 42(4), 556–568.
- Chimonyo, V. G. P., Modi, A. T., & Mabhaudhi, T. (2016). Water use and productivity of a sorghum-cowpea-bottle gourd intercrop system. *Agricultural Water Management*, 165, 82-96. 10.1016/j.agwat.2015.11.014
- Chirwa, T. S., Mafongoya, P. L., & Chintu, R. (2003). Mixed planted-fallows using coppicing and non-coppicing tree species for degraded Acrisols in eastern Zambia. *Agroforestry Systems*, 59(3), 243-251. 10.1023/B:AGFO.0000005225.12629.61
- Collins, H. P., Fay, P. A., Kimura, E., Fransen, S., & Himes, A. (2017). Intercropping with switchgrass improves net greenhouse gas balance in hybrid poplar plantations on a sand soil. *Soil Science of America Journal*, 81(4), 781-795. 10.2136/sssaj2017.09.0294
- Ding, Z., Zu, Y., Chen, J., Bi, B., & Li, Y. (2015). Characteristics of surface runoff, sediment, N and P losses from two agro-forest plantation patterns in Dianchi Basin. *Chinese Journal of Environmental Engineering*, 9(11), 5301-5307
- Du, J., Fan, M., Wang, Z., Ma, Z., Ma, Y., Li, Y., & DE BEURS K M (2017). Effects of root system characteristics and its relationship with soil nutrient loss in runoff under maize and potato intercropping on slop land of red soil. *Journal of Soil and Water Conservation*, 31(01), 55-60
- Fan, Z., An, T., Wu, K., Zhou, F., Zi, S., Yang, Y., ... Wu, B. (2016). Effects of intercropping of maize and potato on sloping land on the water balance and surface runoff. *Agricultural Water Management*, 166, 9-16. 10.1016/j.agwat.2015.12.006
- Fan, Z., Wu, K., An, T., Yang, Y., Zhou, F., & Wu, B. (2016). Study on transpiration and transpiration efficiency of intercropped maize and potato population. *Agricultural Research in the Arid Areas*, 34(05), 129-137
- Fang, F., Qin, F., Li, L., & Yang, Z. (2020). Study on soil water storage performance of different forest types at the north piedmont of Yinshan Mountains. *Journal of Agricultural Science and Technology*, 22(02), 140-148
- Forrester, D. I., Theiveyanathan, S., Collopy, J. J., & Marcar, N. E. (2010). Enhanced water use efficiency in a mixed Eucalyptus globulus and Acacia mearnsii plantation. *Forest Ecology and Management*, 259(9), 1761-1770. 10.1016/j.foreco.2009.07.036
- Fox, J. L., Bhattarai, S. P., & Gyasi-Agyei, Y. (2011). Evaluation of different seed mixtures for grass establishment to mitigate soil erosion on steep slopes of railway batters. *Journal of Irrigation and Drainage Engineering*, 137(9), 624-631. 10.1061/(ASCE)IR.1943-4774.0000319
- Franco, J. G., Gramig, G. G., Beamer, K. P., & Hendrickson, J. R. (2021). Cover crop mixtures enhance stability but not productivity in a semi-arid climate. *Agronomy of Journal*, 113(3), 2664-2680. 10.1002/agj2.20695
- Gao, Y., Duan, A., Liu, Z., Chen, J., Wang, H., & Liu, Z. (2008). Experimental study on soil evaporation of different intercropping patterns for maize and soybean. *Transactions of the CSAE*, (07), 44-48
- Gao, Y., Duan, A., Qiu, X., Liu, Z., Sun, J., Zhang, J., & Wang, H. (2010). Distribution of roots and root length density in a maize/soybean strip intercropping system. *Agricultural Water Management*, 98(1), 199-212. 10.1016/j.agwat.2010.08.021
- Gathumbi, S. M., Ndufa, J. K., Giller, K. E., & Cadisch, G. (2002). Do species mixtures increase above- and belowground resource capture in woody and herbaceous tropical legumes? *Agronomy Journal*, 94(3), 518-526
- Ghahremani, S., Ebadi, A., Tobeh, A., Hashemi, M., Sedghi, M., Gholipoouri, A., & Barker, A. V. (2021). Short-Term Impact of Monocultured and Mixed Cover Crops on Soil Properties, Weed Suppression,

- and Lettuce Yield. *Communications in soil Science and Plant Analysis*, 52(4), 406-415. [10.1080/00103624.2020.1854295](https://doi.org/10.1080/00103624.2020.1854295)
- Gomes, D. P., de Carvalho, D. F., de Almeida, W. S., Medici, L. O., & Guerra, J. G. M. (2014). Organic carrot-lettuce intercropping using mulch and different irrigation levels. *Journal of Food, Agriculture and Environment*, 12(1), 323-328
- Gong, X., Dang, K., Lv, S., Zhao, G., Tian, L., Luo, Y., & Feng, B. (2020). Interspecific root interactions and water-use efficiency of intercropped proso millet and mung bean. *European Journal of Agronomy*, 115(126034). [https://10.1016/j.eja.2020.126034](https://doi.org/10.1016/j.eja.2020.126034)
- Grossiord, C., Granier, A., Gessler, A., Pollastrini, M., & Bonal, D. (2013). The influence of tree species mixture on ecosystem-level carbon accumulation and water use in a mixed boreal plantation. *Forest Ecology and Management*, 298, 82-92. [https://10.1016/j.foreco.2013.03.001](https://doi.org/10.1016/j.foreco.2013.03.001)
- Guo, M., Zhang, T., Li, Z., & Xu, G. (2019). Investigation of runoff and sediment yields under different crop and tillage conditions by field artificial rainfall experiments. *Water (Switzerland)*, 11(5). [https://10.3390/w11051019](https://doi.org/10.3390/w11051019)
- Han, F., Guo, S., Naseer, M. A., Guo, R., Cai, T., Zhang, P., Jia, Z., Yang, D., Chen, X., & Ren, X. (2022). Potential use of maize-peanut intercropping to adapt to drought and nitrogen-shortage impacts. *Plant and Soil*. <https://doi.org/10.1007/s11104-022-05526-x>
- He J., Ma X., Ju Z., Liu K., Zhao J., Ma X., & Jia Z. (2022). Effects of intercropping between oat and broad bean on crop growth and yield in alpine region. *Acta Agrestia Sinica*, 30(9), 2514–2521.
- Hussain, S., Naseer, M. A., Guo, R., Han, F., Ali, B., Chen, X., Ren, X., & Alamri, S. (2023). Nitrogen application enhances yield, yield-attributes, and physiological characteristics of dryland wheat/maize under strip intercropping. *Frontiers in Plant Science*, 14, 1150225. <https://doi.org/10.3389/fpls.2023.1150225>
- Jahansooz, M. R., Yunusa, I. A. M., Coventry, D. R., Palmer, A. R., & Eamus, D. (2007). Radiation- and water-use associated with growth and yields of wheat and chickpea in sole and mixed crops. *European Journal of Agronomy*, 26(3), 275-282. [10.1016/j.eja.2006.10.008](https://doi.org/10.1016/j.eja.2006.10.008)
- Jakhar, P., Adhikary, P., Naik, B., & Madhu, M. (2015). Finger millet (*Eleusine coracana*)-groundnut (*Arachis hypogaea*) strip cropping for enhanced productivity and resource conservation in uplands of Eastern Ghats of Odisha. *Indian Journal of Agronomy*, 60(3), 365-371
- Jiang, P., Guo, F., Luo, Y., Wei, J., Sun, X., & Wu, G. (2007). Water and soil conservation function of typical plantation forest ecosystem in semi-arid region of Western Liaoning Province. *Chinese Journal of Applied Ecology*, 12(12), 2905-2909
- Jonard, M., Andre, F., & Ponette, Q. (2008). Tree species mediated effects on leaf litter dynamics in pure and mixed stands of oak and beech. *Canadian Journal of Forest Research*, 38(3), 528-538. [https://10.1139/X07-183](https://doi.org/10.1139/X07-183)
- Khan, Q. A., & Mevay, K. A. (2019). Productivity and Stability of Multi-Species Cover Crop Mixtures in the Northern Great Plains. *Agronomy Journal*, 111(4), 1817-1827. [https://10.2134/agronj2018.03.0173](https://doi.org/10.2134/agronj2018.03.0173)
- Kherif, O., Haddad, B., Bouras, F.-Z., Seghouani, M., Zemmouri, B., Gamouh, R., Hamzaoui, N., Larbi, A., Rebouh, N.-Y., & Latati, M. (2023). Simultaneous Assessment of Water and Nitrogen Use Efficiency in Rain-Fed Chickpea-Durum Wheat Intercropping Systems. *Agriculture*, 13(5), 947. <https://doi.org/10.3390/agriculture13050947>
- Khokhar, A., Yousuf, A., Singh, M., Sharma, V., Sandhu, P. S., & Chary, G. R. (2021). Impact of land configuration and strip-Intercropping on runoff, soil loss and crop yields under rainfed conditions

- in the shivalik foothills of north-west, India. *Sustainability*, 13(11). 10.3390/su13116282
- Li, S., He, K., Tian, Z., Zuo, W., Wang, W., Tang, D., Zhang, T., Li, Qian. (2016). Seasonal changes and the driving factors of soil respiration among five typical forest types in the high-elevation-cold region, Qinghai, northwestern China. *Journal of Beijing Forestry University*, 38(10), 95-103.
- Li, Q., Zhou, D., Denton, M. D., & Cong, S. (2019). Alfalfa monocultures promote soil organic carbon accumulation to a greater extent than perennial grass monocultures or grass-alfalfa mixtures. *Ecological Engineering*, 131, 53-62. 10.1016/j.ecoleng.2019.03.002
- Li, E., Mu, Yang., He, Y., Zhang, X., & Yang, S. (2020). Effect of wheat/alfalfa intercropping system on soil moisture and water utilization efficiency. *Research of Soil and Water Conservation*, 27(01), 54-58
- Li, Q., Wang, X., Li, M., Chen, X., Ren, X., & Zhao, X. (2021). Effect of wheat/maize strip intercropping and nitrogen fertilizer on crop water consumption and water use. *Acta Agriculturae Boreali-occidentalis Sinica*, 30(06), 819-828.
- Liu, S., Chai, Q., & Huang, G. (2013). Relationships among soil respiration, soil temperature and dry matter accumulation for wheat-maize intercropping in an arid environment. *Canadian Journal of Plant*, 93(4), 715-724. 10.4141/CJPS2012-274
- Liu J., Wang S., Kang J., & Xu B. (2019). Effects of water and phosphorus supply on biomass production, water use efficiency and interspecific relationship of switchgrass and bushclover. *Acta Agrestia Sinica*, 06(27).
- Liu, X., Sun, S., & Li, Y. (2021). Soil infiltration characteristics under five forest types in southern and northern mountains of Lanzhou city. *Bulletin of Soil and Water Conservation*, 41(03), 69-75.
- Luo, N., Sun, G., & Liu, G. (1999). Preliminary study on soil water storage of different plantations. *Journal of Anhui Agricultural Sciences*, (04), 353-355
- Luo, Y., Han, S., Wang, H., Liu, J., Wei, J., & Wu, G. (2004). Water conservation of several artificial forest ecosystem in semiarid region of western Liaoning Province. *Chinese Journal of Applied Ecology*, (06), 919-923
- Ma, L., Li, Y., Wu, P., Zhao, X., Chen, X., & Gao, X. (2019). Effects of varied water regimes on root development and its relations with soil water under wheat/maize intercropping system. *Plant and Soil*, 439(1-2SI), 113-130. 10.1007/s11104-018-3800-9
- Ma, L., Li, Y., Wu, P., Zhao, X., Chen, X., & Gao, X. (2020). Coupling evapotranspiration partitioning with water migration to identify the water consumption characteristics of wheat and maize in an intercropping system. *Agricultural and Forest Meteorology*, 290(108034). 10.1016/j.agrformet.2020.108034
- Ma Y., Wang J., Lv Y., Ma Y., & Ma W. (2022). Effects of water regulation on yield and water use efficiency of forages mixed with legume and grass. *Crop Research*, 36(5), 441-449. <https://doi.org/10.16848/j.cnki.issn.1001-5280.2022.05.09>
- Machiwal, D., Kumar, S., Islam, A., Kumar, S., Jat, S. R., Vaishnav, M., & Dayal, D. (2021). Evaluating effect of cover crops on runoff, soil loss and soil nutrients in an Indian arid region. *Communications in Soil Science and Plant Analysis*, 52(14), 1669-1688. 10.1080/00103624.2021.1892726
- Mao, L., Zhang, L., Li, W., van der Werf, W., Sun, J., Spiertz, H., & Li, L. (2012). Yield advantage and water saving in maize/pea intercrop. *Field Crops Research*, 138, 11-20. 10.1016/j.fcr.2012.09.019
- Mbanyele, V., Mtambanengwe, F., Nezomba, H., Groot, J., & Mapfumo, P. (2021). Comparative short-term performance of soil water management options for increased productivity of maize-cowpea intercropping in semi-arid Zimbabwe. *Journal of Agriculture and Food Research*, 5.

- 10.1016/j.jafr.2021.100189
- Mohsenabadi, G. R., Jahansooz, M. R., Chaichi, M. R., Rahimian Mashhadi, H., Liaghat, A. M., & Savaghebi, G. R. (2008). Evaluation of barley-vetch intercrop at different nitrogen rates. *Journal of Agricultural Science and Technology*, 10(1), 23-31
- Moore, G. W., Bond, B. J., & Jones, J. A. (2011). A comparison of annual transpiration and productivity in monoculture and mixed-species Douglas-fir and red alder stands. *Forest Ecology and Management*, 262(12), 2263-2270. 10.1016/j.foreco.2011.08.018
- Mu, Y., Chai, Q., Yu, A., Yang, C., Qi, W., Feng, F., & Kong, X. (2013). Performance of wheat/maize intercropping is a function of belowground interspecies interactions. *Crop Science*, 53(5), 2186-2194. 10.2135/cropsci2012.11.0619
- Nagase, A., & Dunnett, N. (2012). Amount of water runoff from different vegetation types on extensive green roofs: Effects of plant species, diversity and plant structure. *Landscape and Urban Planning*, 104(3-4), 356-363. 10.1016/j.landurbplan.2011.11.001
- Nelson, W. C. D., Hoffmann, M. P., Vadez, V., Roetter, R. P., & Whitbread, A. M. (2018). Testing pearl millet and cowpea intercropping systems under high temperatures. *Field Crops Research*, 217, 150-166. 10.1016/j.fcr.2017.12.014
- Niu, Y. N., Liu, D. M., Luo, Z. Z., & Chai, Q. (2018). Characteristics of crop water consumption under maize/pea intercropping systems with different irrigation levels. *Agricultural Research in the Arid Areas*, 36(1), 83-88. 10.7606/j.issn.1000-7601.2018.01.13
- Nyawade, S. O., Karanja, N. N., Gachene, C. K. K., Gitari, H. I., Schulte-Geldermann, E., & Parker, M. L. (2019). Intercropping optimizes soil temperature and increases crop water productivity and radiation use efficiency of rainfed potato. *American Journal of Potato Research*, 96(5), 457-471. 10.1007/s12230-019-09737-4
- Ogindo, H. O., & Walker, S. (2005). Comparison of measured changes in seasonal soil water content by rainfed maize-bean intercrop and component cropping systems in a semi-arid region of southern Africa. *Physics and Chemistry of the Earth*, 30(11-16 SPEC. ISS.), 799-808. 10.1016/j.pce.2005.08.023
- Ouyang, C., Wu, B., Wu, K., Yang, Y., Duan, Y., Zhang, X., ... De Beurs K M. (2018). Effect of ridging on soil erosion under maize and potato intercropping in southwest China. *Southwest China Journal of Agricultural Science*, 31(09), 1802-1810
- Ouyang, C., Wu, K., An, T., He, J., Zi, S., Yang, Y., & Wu, B. (2017). Productivity, economic, and environmental benefits in intercropping of maize with chili and grass. *Agronomy Journal*, 109(5), 2407-2414. 10.2134/agronj2016.10.0579
- Pankou, C., Lithourgidis, A., & Dordas, C. (2021). Effect of irrigation on intercropping systems of wheat (*Triticum aestivum* L.) with pea (*Pisum sativum* L.). *Agronomy-Basel*, 11(2). 10.3390/agronomy11020283
- Powell, G. W., & Bork, E. W. (2004). Competition and facilitation in mixtures of aspen seedlings, alfalfa, and marsh reed grass. *Canadian Journal of Forest Research*, 34(9), 1858-1869. 10.1139/X04-065
- Rahman, T., Ye, L., Liu, X., Iqbal, N., Du, J., Gao, R., ... Yang, W. (2017). Water use efficiency and water distribution planting patterns in maize-soybean relay strip intercropping systems. *Experimental Agriculture*, 53(2), 159-177. 10.1017/S0014479716000260
- Rahman, T., Liu, X., Hussain, S., Ahmed, S., Chen, G., Yang, F., ... Yang, W. (2017). Water use efficiency and evapotranspiration in maize-soybean relay strip intercrop systems as affected by planting geometries. *PLoS ONE*, 12(e01783326). 10.1371/journal.pone.0178332

- Ren, J., Zhang, L., Duan, Y., Zhang, J., Evers, J. B., Zhang, Y., ... van der Werf, W. (2019). Intercropping potato (*Solanum tuberosum* L.) with hairy vetch (*Vicia villosa*) increases water use efficiency in dry conditions. *Field Crop Research*, 240, 168-176. [10.1016/j.fcr.2018.12.002](https://doi.org/10.1016/j.fcr.2018.12.002)
- Ren, Y. Y., Zhang, L., Yan, M. F., Zhang, Y. J., Chen, Y. L., Palta, J. A., & Zhang, S. Q. (2021). Effect of sowing proportion on above- and below-ground competition in maize-soybean intercrops. *Scientific Reports*, 11(1). [10.1038/s41598-021-95242-w](https://doi.org/10.1038/s41598-021-95242-w)
- Schume, H., Jost, G., & Hager, H. (2004). Soil water depletion and recharge patterns in mixed and pure forest stands of European beech and Norway spruce. *Journal of Hydrology*, 289(1-4), 258-274. [10.1016/j.jhydrol.2003.11.036](https://doi.org/10.1016/j.jhydrol.2003.11.036)
- Shang X., Wang F., Xia B., Galimah Girmanee Taylor, Zhou Y., & Pang L. (2022). Effects of corn intercropping of maize with rapeseed on soil hydrothermal effect and yields along the Yellow River irrigation area. *Tropical Agricultural Engineering*, 46(6), 37–44.
- Shen, L., Wang, X., Liu, T., Wei, W., Zhang, S., Keyhani, A. B., Li, L., & Zhang, W. (2023). Border row effects on the distribution of root and soil resources in maize–soybean strip intercropping systems. *Soil and Tillage Research*, 233, 105812. <https://doi.org/10.1016/j.still.2023.105812>
- Shu J., Wang J., Gao Z., Chen J., Ding W., & Xu B. (2014). Soil Water Use of Bothriochloa Ischaemum and Lespedeza Davurica Mixture Grassland in Two Years with Different Rainfall Amounts. *Bulletin of Soil and Water Conservation*, 34(3), 75–81. <https://doi.org/10.13961/j.cnki.stbctb.2014.03.015>
- Singh, R. K., Chaudhary, R. S., Somasundaram, J., Sinha, N. K., Mohanty, M., Hati, K. M., ... Lal, R. (2020). Soil and nutrients losses under different crop covers in vertisols of Central India. *Journal of Soils and Sediments*, 20(2), 609-620. [10.1007/s11368-019-02437-w](https://doi.org/10.1007/s11368-019-02437-w)
- St Aime, R., Zehnder, G. W., Talley, C., & Narayanan, S. (2020). Differences in biomass production and water use efficiency among seven different cover crops in the wet winter seasons of 2016/17 and 2018 in South Carolina. *Agronomy-Basel*, 10(4). [10.3390/agronomy10040463](https://doi.org/10.3390/agronomy10040463)
- Su Y., Gao X., Zhang H., & Zhu L. (2018). Effects of different water treatments on water use feature for monoculture and mixed cropping of gramineous and leguminous forages. *Journal of Henan Agricultural Sciences*, 47(2), 37–42. <https://doi.org/10.15933/j.cnki.1004-3268.2018.02.008>
- Sun, B., Peng, Y., Yang, H., Li, Z., Gao, Y., Wang, C., ... Liu, Y. (2014). Alfalfa (*Medicago sativa* L.)/maize (*Zea mays* L.) intercropping provides a feasible way to improve yield and economic incomes in farming and pastoral areas of northeast China. *PLoS One*, 9(10). [10.1371/journal.pone.0110556](https://doi.org/10.1371/journal.pone.0110556)
- Te, X., Din, A. M. U., Cui, K., Raza, M. A., Fraz Ali, M., & Xiao, J. (2023). Inter-specific root interactions and water use efficiency of maize/soybean relay strip intercropping. *Field Crops Research*, 291, 108793. <https://doi.org/10.1016/j.fcr.2022.108793>
- Tetteh, E. N., Abunyewa, A. A., Tuffour, H. O., Berchie, J. N., Acheampong, P. P., Twum-Ampofo, K., ... Partey, S. T. (2019). Rubber and plantain intercropping: Effects of different planting densities on soil characteristics. *PLoS ONE*, 14(e0209260). [10.1371/journal.pone.0209260](https://doi.org/10.1371/journal.pone.0209260)
- Thomas, A., Priault, P., Piutti, S., Dalle, E., & Marron, N. (2021). Growth dynamics of fast-growing tree species in mixed forestry and agroforestry plantations. *Forest Ecology and Management*, 480. [10.1016/j.foreco.2020.118672](https://doi.org/10.1016/j.foreco.2020.118672)
- Wan, T. Y., Dong, X. W., Yu, L. H., Huang, H. L., Li, D. D., Han, H. Z., ... Tu, S. X. (2021). Comparative study of three *Pteris vittata*-crop intercropping modes in arsenic accumulation and phytoremediation efficiency. *Environmental Technology & Innovation*, 24. [10.1016/j.eti.2021.101923](https://doi.org/10.1016/j.eti.2021.101923)
- Wan, Z., Gu, R., Yan, Y., Bai, L., Bao, T., Yang, J., Gao, Q., Ganjurjav, H., Hu, G., Zhou, H., & Chun, X.

- (2022). Effects of water levels on plant traits and nitrogen use efficiency in monoculture and intercropped artificial grasslands. *Frontiers in Plant Science*, 13, 958852. <https://doi.org/10.3389/fpls.2022.958852>
- Wang, Y., & Chen, J. (2015). Study on yield and soil and water conservation benefit of maize and potato intercropping in slope farmland. *Yunnan Agriculture*, (03), 40-43
- Wang, S., & Wang, Y. (2016). Study on mixed sowing of leymus chinensis and alfalfa in semi-arid hilly region of southern Ninxia. *Ningxia Journal of Agricultural and Forest Science and Technology*, 57(02), 7-9
- Wang P., Li L., Li T., Cao J., Zhai Y., Wu Q., Wan S., & Chen G. (2022). Water consumption characteristics of jujube cotton intercropping composite system under different configuration modes. *Jiangsu Agricultural Sciences*, 50(8), 207–214. <https://doi.org/10.15889/j.issn.1002-1302.2022.08.037>
- Wang, M., Zhang, G., Liu, X., & Yao, X. (2008). Characteristics of soil water infiltration and water - holding under different forest community in Yimeng Mountainous forest area. *Science of Soil and Water Conservation*, 6(06), 26-31
- Wang, J., Yin, W., & Liu, D. (2011). Influence of intercropping maize with alfalfa on runoff and sediment yield after rainfall on loess slope land. *Water Saving Irrigation*, (08), 43-46
- Wang, L., Zhong, C., Gao, P., Xi, W., & Zhang, S. (2015). Soil infiltration characteristics in agroforestry systems and their relationships with the temporal distribution of rainfall on the loess plateau in China. *PLoS ONE*, 10(4). 10.1371/journal.pone.0124767
- Wang, H. Q., Tian, Y. H., Huang, W. L., & Xiao, S. L. (2015). Analyzing the impact of irrigation quantity on biomass and water use efficiency of main grasses in artificial grassland in Inner Mongolia. *Acta Ecologica Sinica*, 35(10), 3225-3232. 10.5846/stxb201312022858
- Wang, X., Wang, H., Li, W., & Bi, S. (2016). Research on soil water and crop yield of alfalfa-maize intercropping system at slope land in the hilly regions of Sichuan province. *Journal of Natural Science of Hunan Normal University*, 39(06), 9-14
- Wang J., Gao Z., Shu J., Wu A., & Xu B. (2016). Study on biomass production and soil water use of Bothriochloa isaemum and Lespedeza davurica mixture grassland in Loess hilly-gully region. *Acta Agriculturae Boreali-occidentalis Sinica*, 25(2), 173–181.
- Wang, L., Dai, Y., Sun, J., & Wan, X. (2017). Differential hydric deficit responses of Robinia pseudoacacia and Platycladus orientalis in pure and mixed stands in northern China and the species interactions under drought. *Trees - Structure and Function*, 31(6), 2011-2021. 10.1007/s00468-017-1605-8
- Wang, Z., Jiang, H., & Shen, Y. (2020). Forage production and soil water balance in oat and common vetch sole crops and intercrops cultivated in the summer-autumn fallow season on the Chinese Loess Plateau. *European Journal of Agronomy*, 115(126042). 10.1016/j.eja.2020.126042
- Wang W., Wang Q., Yi J., Wan J., & Liu M. (2022). Canopy interception and redistribution process of different types of forest in the hillslope of the Three Gorges Area. *Journal of Central China Normal University (Nat. Sci.)*, 56(3), 541–550. <https://doi.org/10.19603/j.cnki.1000-1190.2022.03.022>
- Wang, W., Li, M.-Y., Zhang, W., Khan, A., Zhou, R., Zhu, S.-G., Wang, B.-Z., Yang, Y.-M., Tao, H.-Y., Li, W.-B., & Xiong, Y.-C. (2023). Soil moisture drives the shift from selection to complementarity effect in the rainfed maize/faba bean intercropping system. *Plant and Soil*. <https://doi.org/10.1007/s11104-023-06037-z>
- Wu, X., Wei, Y., Wang, M., & Wang, L. (2015). Characteristics of runoff and sediment yield in sloping

- farmland of black soil region under different farmland vegetation. *Bulletin of Soil and Water Conservation*, 35(03), 101-104
- Wu, G., Yang, Z., Cui, Z., Liu, Y., Fang, N., & Shi, Z.. (2016). Mixed artificial grasslands with more roots improved mine soil infiltration capacity. *Journal of Hydrology*, 535, 54–60. <https://doi.org/10.1016/j.jhydrol.2016.01.059>
- Xiong, J., Yan, H., Shao, W., Tan, W., Tang, X., Li, W., ... Zheng, X. (2016). Effects of cassava + peanut intercropping on photosynthetic characteristics, agronomic characters and yield of crops. *Jiangsu Agricultural Sciences*, 44(06), 165-168
- Xu Z., Wang D., Zhao Y., Liu W., & Xie K. (2022). Effects of drought-rehydration patterns on changes in photosynthetic efficiency and osmotic regulation of mixed forage. *Journal of Xinjiang Agricultural University*, 45(1), 9–16.
- Xu, B. C., Li, F. M., & Shan, L. (2008). Switchgrass and milkvetch intercropping under 2 : 1 row-replacement in semiarid region, northwest China: Aboveground biomass and water use efficiency. *European Journal of Agronomy*, 28(3), 485-492. [10.1016/j.eja.2007.11.011](https://doi.org/10.1016/j.eja.2007.11.011)
- Xu, P., Chen, G., Wu, Q., Zhai, Y., Feng, F., Li, L., ... Wang, P. (2019). Effects of field collocation patterns on water consumption characteristics of jujube-cotton intercropping system in Southern Xinjiang. *Agricultural Research in the Arid Areas*, 37(05), 46-54
- Xu, B., Shan, L., Zhang, S., Deng, X., & Li, F. (2008). Evaluation of switchgrass and sainfoin intercropping under 2:1 row-replacement in semiarid region, northwest China. *Agrican Journal of Biotechnology*, 7(22), 4056-4067
- Xu, R., Shi, W., Kamran, M., Chang, S., Jia, Q., & Hou, F. (2023). Grass-legume mixture and nitrogen application improve yield, quality, and water and nitrogen utilization efficiency of grazed pastures in the loess plateau. *Frontiers in Plant Science*, 14. <https://www.frontiersin.org/articles/10.3389/fpls.2023.1088849>
- Xu, W., Niu, F., Kang, F., Xu, B., Deng, X., Palta, J. A., & Chen, Y. (2022). Biomass allocation and competitive ability of a semiarid perennial grass and a legume in mixtures under periodical soil water decreasing conditions. *Agronomy*, 12(10), 2256. <https://doi.org/10.3390/agronomy12102256>
- Yang, S., Mao, K., Yang, H., Wang, Y., Feng, Q., Wang, S., & Miao, N. (2023). Stand characteristics and ecological benefits of Chinese Fir, Chinese Cedar, and mixed plantations in the mountainous areas of the Sichuan Basin. *Forest Ecology and Management*, 544, 121168. <https://doi.org/10.1016/j.foreco.2023.121168>
- Ye, L., Yang, F., Su, B., Zhang, J., Liu, W., & Yang, W. (2015). Effect of different field patterns on water distribution and water use efficiency in maize-soybean relay intercropping systems. *Agricultural Research in the Arid Areas*, 33(04), 41-48
- Yun H., Bi H., Wang S., Zhao D., Cui Y., Wang N., & Lan. (2021). Soil physical and chemical characteristics of different forest types and their effects on soil infiltration process. *Journal of Soil and Water Conservation*, 35(6), 183–189. <https://doi.org/10.13870/j.cnki.stbcbx.2021.06.025>
- Žalac, H., Herman, G., Ergović, L., Jović, J., Zebec, V., Bubalo, A., & Ivezić, V. (2022). Ecological and Agronomic Benefits of Intercropping Maize in a Walnut Orchard—A Case Study. *Agronomy*, 13(1), 77. <https://doi.org/10.3390/agronomy13010077>
- Zhang, G., Xia, J., Wang, G., Zhang, S., & Yang, J. (2005). Study on soil moisture physical characteristics of artificial forest in Granite Mountainous region. *Journal of Soil and Water Conservation*, (06), 46-50
- Zhang X., Xu B., & Li F. (2008). Competition and growth characteristics of three legumes on high land

- Loess Plateau. *Chinese Journal of Eco-Agriculture*, 3, 686–692.
- Zhang H., Zhu L., & Xu X. (2017). Effect of mixed sowing of graminaceous and leguminous forages under different water regimes in Ningxia central semi-arid belt. *Pratacultural Science*, 34(4), 777–787.
- Zhang, Z., Shi, H., Li, X., & Yan, J. (2017). Research on the mechanism of water and salt transport in root soil and the advantage of intercropping system in Hetao irrigation district. *Journal of Hydraulic Engineering*, 48(04), 408-416
- Zhang H., Qi G., Kang Y., Yin M., Ma Y., Jiang Y., & Kang Y. (2021). The effect of water regulation on the yield, quality, and water use of mixed planted artificial grassland. *Water Resources Planning and Design*, 4, 63–69.
- Zhang H., Shi S., Wu B., Li Z., Li X., Wu F., Kang W., & Chen X. (2022). Physiological Characteristics of Alfalfa Mixed with Perennial Gramineous Forages with Different Life Forms. *Acta Agrestia Sinica*, 30(8), 2144–2157.
- Zhang, S., Verheyen, K., De Frenne, P., & Landuyt, D. (2022). Tree species mixing affects throughfall in a young temperate forest plantation. *Agricultural and Forest Meteorology*, 327, 109220. <https://doi.org/10.1016/j.agrformet.2022.109220>
- Zhang W., Fei Y., Tian X., & Du W. (2022). Differences of the photosynthetic performance between mono-and grass-legume mixture of the double cropped pasture in Gannan alpine pasture. *Chinese Journal of Grassland*, 44(8), 52–60. <https://doi.org/10.16742/j.zgcdxb.20210368>
- Zhao, X., Sun, D., & Wang, Q. (2012). Effect of intercropped models of maize and cabbage on the temporal and spatial distribution of soil moisture and water use efficiency. *Chinese Journal of Agrometeorology*, 33(03), 374-381
- Zhao, Y., Zhang, B., & Hill, R. (2012b). Water use assessment in alley cropping systems within subtropical China. *Agroforestry Systems*, 84(2), 243-259. 10.1007/s10457-011-9458-4
- Zhao, R., Zhang, J., Li, Y., Zhang, Y., & Tian, N. (2016). Soil moisture characteristics and its response to rainfall in artificial forests in Loess region of western Shanxi province. *Journal of Soil and Water Conservation*, 30(01), 178-183
- Zhao, D., Bi, X., Hou, G., Cui, Y., Wang, N., Ma, X., & Feng, C. (2021). Soil moisture dynamics of typical plantation in Loess region of west Shanxi. *Journal of Soil and Water Conservation*, 35(01), 181-187
- Zhao G., Cheng Y., Yang Y., Zhou F., Yao G., Lv kai, & An T. (2022). Effects of maize intercropping potato inoculation with arbuscular mycorrhizal fungi on soil erosion and nitrogen losses in slope farmland. *Journal of Yunnan Agricultural University (Natural Science)*, 37(3), 523–529.
- Zhao, Y., & Zhang, B. (2012a). Competitive assessment of water use in alley cropping system in low hilly red soil region. *Soils*, 84(2), 243-259. 10.1007/s10457-011-9458-4
- Zheng, L., & Chen, H. (2017). Yield and soil moisture consumption of intercropping maize with wheat. *Gansu Agricultural Science and Technology*, (12), 53-57
- Zhou, Q., Chen, J., Shi, C., Xing, Y., Ma, S., Zhang, X., ... De Beurs K M. (2019). Effects of Chinese milk vetch intercropping with rapeseed under straw mulching on soil microenvironment. *Agricultural Research in the Arid Areas*, 37(04), 193-199
- Zhou, Q., Gunina, A., Chen, J., Xing, Y., Xiong, Y., Guo, Z., & Wang, L. (2023). Reduction in soil CO<sub>2</sub> efflux through alteration of hydrothermal factor in milk vetch (*Astragalus sinicus* L.)-rapeseed (*Brassica napus* L.) intercropping system. *Frontiers in Plant Science*, 13, 1093507. <https://doi.org/10.3389/fpls.2022.1093507>



- Zhu, S.-G., Zhu, H., Cheng, Z.-G., Zhou, R., Yang, Y.-M., Wang, J., Wang, W., Wang, B.-Z., Tao, H.-Y., & Xiong, Y.-C. (2023). Soil water and phosphorus availability determines plant-plant facilitation in maize-grass pea intercropping system. *Plant and Soil*, 482(1–2), 451–467. <https://doi.org/10.1007/s11104-022-05701-0>
- Zuo S., Wang H., Li F., & Zou H. (2008). Driving mechanism of simultaneous pattern on soil moisture utilization under the monoculture and mixture of *Medicago sativa* and *Astragalus adsurgens* grown in an arid region of the Loess Plateau of China. *Acta Prataculturae Sinica*, 4, 32–41.
